# Supplementary material for: Lutetium alkyl and hydride complexes in a non-cyclopentadienyl coordination environment
Source: Royal Society of Chemistry journal article supplement (doi:10.1039/b710228n), 2007-01-01
Supplement: b710228n.pdf [file b710228n.pdf]

## Supplementary Material (ESI) for Dalton Transactions

This journal is © The Royal Society of Chemistry

### Lutetium alkyl and hydride complexes in a non-cyclopentadienyl coordination environment

Marcin Konkol, Thomas P. Spaniol, Małgorzata Kondracka, Jun Okuda\*

*Institute for Inorganic Chemistry, RWTH Aachen University, Landoltweg 1, D-52074*

*Germany*

**Table 1.1 Crystal data and structure refinement for [Lu(tbmp)(CH<sub>2</sub>SiMe<sub>3</sub>)(THF)<sub>2</sub>] (1).**

|                                 |                                                      |         |
|---------------------------------|------------------------------------------------------|---------|
| Identification code             | mk1                                                  |         |
| Empirical formula               | C <sub>34</sub> H <sub>55</sub> LuO <sub>4</sub> SSi |         |
| Formula weight                  | 762.90                                               |         |
| Temperature                     | 130(2) K                                             |         |
| Wavelength                      | 0.71073 Å                                            |         |
| Crystal system                  | Orthorhombic                                         |         |
| Space group                     | Pbca                                                 |         |
| Unit cell dimensions            | a = 17.657(3) Å                                      | α = 90° |
|                                 | b = 18.687(3) Å                                      | β = 90° |
|                                 | c = 22.178(4) Å                                      | γ = 90° |
| Volume                          | 7318(2) Å <sup>3</sup>                               |         |
| Z                               | 8                                                    |         |
| Density (calculated)            | 1.385 Mg/m <sup>3</sup>                              |         |
| Absorption coefficient          | 2.820 mm <sup>-1</sup>                               |         |
| F(000)                          | 3136                                                 |         |
| Crystal size                    | 0.25×0.12×0.10 mm <sup>3</sup>                       |         |
| Theta range for data collection | 2.17 to 28.42°                                       |         |
| Index ranges                    | -23≤h≤23, -24≤k≤25, -29≤l≤29                         |         |
| Reflections collected           | 81995                                                |         |
| Independent reflections         | 9170 [R(int) = 0.1015]                               |         |

|                                   |                                             |
|-----------------------------------|---------------------------------------------|
| Completeness to theta = 28.42°    | 99.6 %                                      |
| Absorption correction             | Empirical                                   |
| Max. and min. transmission        | 0.7657 and 0.5391                           |
| Refinement method                 | Full-matrix least-squares on F <sup>2</sup> |
| Data / restraints / parameters    | 9170 / 0 / 381                              |
| Goodness-of-fit on F <sup>2</sup> | 1.570                                       |
| Final R indices [I>2sigma(I)]     | R1 = 0.0848, wR2 = 0.1504                   |
| R indices (all data)              | R1 = 0.1013, wR2 = 0.1552                   |
| Largest diff. peak and hole       | 1.994 and -4.259 e.Å <sup>-3</sup>          |

**Table 1.2 Bond lengths [Å] and angles [°] for mk1.**

---

|            |            |
|------------|------------|
| Lu-O(1)    | 2.098(5)   |
| Lu-O(2)    | 2.099(4)   |
| Lu-O(3)    | 2.332(5)   |
| Lu-O(4)    | 2.334(5)   |
| Lu-C(23)   | 2.348(7)   |
| Lu-S       | 2.9553(17) |
| Si-C(23)   | 1.821(7)   |
| Si-C(25)   | 1.864(11)  |
| Si-C(24)   | 1.879(8)   |
| Si-C(26)   | 1.882(9)   |
| S-C(2)     | 1.794(7)   |
| S-C(12)    | 1.794(7)   |
| O(1)-C(1)  | 1.323(8)   |
| O(2)-C(13) | 1.332(8)   |
| O(3)-C(30) | 1.451(9)   |
| O(3)-C(27) | 1.461(9)   |
| O(4)-C(34) | 1.419(10)  |
| O(4)-C(31) | 1.459(8)   |
| C(1)-C(2)  | 1.399(9)   |
| C(1)-C(6)  | 1.420(9)   |
| C(2)-C(3)  | 1.388(9)   |
| C(3)-C(4)  | 1.386(10)  |

|              |           |
|--------------|-----------|
| C(3)-H(3)    | 0.9500    |
| C(4)-C(5)    | 1.389(10) |
| C(4)-C(7)    | 1.513(10) |
| C(5)-C(6)    | 1.395(9)  |
| C(5)-H(5)    | 0.9500    |
| C(6)-C(8)    | 1.529(9)  |
| C(7)-H(7A)   | 0.9800    |
| C(7)-H(7B)   | 0.9800    |
| C(7)-H(7C)   | 0.9800    |
| C(8)-C(9)    | 1.525(10) |
| C(8)-C(11)   | 1.533(10) |
| C(8)-C(10)   | 1.548(10) |
| C(9)-H(9A)   | 0.9800    |
| C(9)-H(9B)   | 0.9800    |
| C(9)-H(9C)   | 0.9800    |
| C(10)-H(10A) | 0.9800    |
| C(10)-H(10B) | 0.9800    |
| C(10)-H(10C) | 0.9800    |
| C(11)-H(11A) | 0.9800    |
| C(11)-H(11B) | 0.9800    |
| C(11)-H(11C) | 0.9800    |
| C(12)-C(17)  | 1.395(9)  |
| C(12)-C(13)  | 1.399(9)  |
| C(13)-C(14)  | 1.426(9)  |
| C(14)-C(15)  | 1.386(9)  |
| C(14)-C(19)  | 1.526(10) |
| C(15)-C(16)  | 1.403(10) |
| C(15)-H(15)  | 0.9500    |
| C(16)-C(17)  | 1.380(10) |
| C(16)-C(18)  | 1.514(10) |
| C(17)-H(17)  | 0.9500    |
| C(18)-H(18A) | 0.9800    |
| C(18)-H(18B) | 0.9800    |
| C(18)-H(18C) | 0.9800    |

|              |           |
|--------------|-----------|
| C(19)-C(20)  | 1.531(11) |
| C(19)-C(21)  | 1.543(10) |
| C(19)-C(22)  | 1.540(10) |
| C(20)-H(20A) | 0.9800    |
| C(20)-H(20B) | 0.9800    |
| C(20)-H(20C) | 0.9800    |
| C(21)-H(21A) | 0.9800    |
| C(21)-H(21B) | 0.9800    |
| C(21)-H(21C) | 0.9800    |
| C(22)-H(22A) | 0.9800    |
| C(22)-H(22B) | 0.9800    |
| C(22)-H(22C) | 0.9800    |
| C(23)-H(23A) | 0.9900    |
| C(23)-H(23B) | 0.9900    |
| C(24)-H(24A) | 0.9800    |
| C(24)-H(24B) | 0.9800    |
| C(24)-H(24C) | 0.9800    |
| C(25)-H(25A) | 0.9800    |
| C(25)-H(25B) | 0.9800    |
| C(25)-H(25C) | 0.9800    |
| C(26)-H(26A) | 0.9800    |
| C(26)-H(26B) | 0.9800    |
| C(26)-H(26C) | 0.9800    |
| C(27)-C(28)  | 1.497(12) |
| C(27)-H(27A) | 0.9900    |
| C(27)-H(27B) | 0.9900    |
| C(28)-C(29)  | 1.505(13) |
| C(28)-H(28A) | 0.9900    |
| C(28)-H(28B) | 0.9900    |
| C(29)-C(30)  | 1.506(12) |
| C(29)-H(29A) | 0.9900    |
| C(29)-H(29B) | 0.9900    |
| C(30)-H(30A) | 0.9900    |
| C(30)-H(30B) | 0.9900    |

|              |           |
|--------------|-----------|
| C(31)-C(32)  | 1.500(11) |
| C(31)-H(31A) | 0.9900    |
| C(31)-H(31B) | 0.9900    |
| C(32)-C(33)  | 1.532(11) |
| C(32)-H(32A) | 0.9900    |
| C(32)-H(32B) | 0.9900    |
| C(33)-C(34)  | 1.513(12) |
| C(33)-H(33A) | 0.9900    |
| C(33)-H(33B) | 0.9900    |
| C(34)-H(34A) | 0.9900    |
| C(34)-H(34B) | 0.9900    |

|                |            |
|----------------|------------|
| O(1)-Lu-O(2)   | 97.26(18)  |
| O(1)-Lu-O(3)   | 150.02(18) |
| O(2)-Lu-O(3)   | 85.74(17)  |
| O(1)-Lu-O(4)   | 86.10(18)  |
| O(2)-Lu-O(4)   | 156.49(18) |
| O(3)-Lu-O(4)   | 80.16(17)  |
| O(1)-Lu-C(23)  | 104.4(2)   |
| O(2)-Lu-C(23)  | 108.3(2)   |
| O(3)-Lu-C(23)  | 102.9(2)   |
| O(4)-Lu-C(23)  | 93.2(2)    |
| O(1)-Lu-S      | 69.48(13)  |
| O(2)-Lu-S      | 70.51(13)  |
| O(3)-Lu-S      | 83.73(14)  |
| O(4)-Lu-S      | 89.22(13)  |
| C(23)-Lu-S     | 173.23(19) |
| C(23)-Si-C(25) | 111.1(5)   |
| C(23)-Si-C(24) | 110.3(4)   |
| C(25)-Si-C(24) | 109.6(5)   |
| C(23)-Si-C(26) | 113.6(4)   |
| C(25)-Si-C(26) | 108.0(6)   |
| C(24)-Si-C(26) | 103.9(4)   |
| C(2)-S-C(12)   | 103.5(3)   |

|                  |          |
|------------------|----------|
| C(2)-S-Lu        | 94.5(2)  |
| C(12)-S-Lu       | 93.6(2)  |
| C(1)-O(1)-Lu     | 136.0(4) |
| C(13)-O(2)-Lu    | 133.7(4) |
| C(30)-O(3)-C(27) | 108.6(6) |
| C(30)-O(3)-Lu    | 126.0(4) |
| C(27)-O(3)-Lu    | 121.7(4) |
| C(34)-O(4)-C(31) | 108.5(6) |
| C(34)-O(4)-Lu    | 126.6(5) |
| C(31)-O(4)-Lu    | 123.9(4) |
| O(1)-C(1)-C(2)   | 121.2(6) |
| O(1)-C(1)-C(6)   | 120.9(6) |
| C(2)-C(1)-C(6)   | 117.9(6) |
| C(3)-C(2)-C(1)   | 122.9(6) |
| C(3)-C(2)-S      | 118.9(5) |
| C(1)-C(2)-S      | 118.1(5) |
| C(2)-C(3)-C(4)   | 119.5(6) |
| C(2)-C(3)-H(3)   | 120.2    |
| C(4)-C(3)-H(3)   | 120.2    |
| C(5)-C(4)-C(3)   | 118.2(6) |
| C(5)-C(4)-C(7)   | 120.6(7) |
| C(3)-C(4)-C(7)   | 121.3(7) |
| C(4)-C(5)-C(6)   | 123.7(6) |
| C(4)-C(5)-H(5)   | 118.1    |
| C(6)-C(5)-H(5)   | 118.1    |
| C(5)-C(6)-C(1)   | 117.8(6) |
| C(5)-C(6)-C(8)   | 121.5(6) |
| C(1)-C(6)-C(8)   | 120.7(6) |
| C(4)-C(7)-H(7A)  | 109.5    |
| C(4)-C(7)-H(7B)  | 109.5    |
| H(7A)-C(7)-H(7B) | 109.5    |
| C(4)-C(7)-H(7C)  | 109.5    |
| H(7A)-C(7)-H(7C) | 109.5    |
| H(7B)-C(7)-H(7C) | 109.5    |

|                     |          |
|---------------------|----------|
| C(9)-C(8)-C(6)      | 109.9(6) |
| C(9)-C(8)-C(11)     | 108.6(6) |
| C(6)-C(8)-C(11)     | 112.5(6) |
| C(9)-C(8)-C(10)     | 109.8(6) |
| C(6)-C(8)-C(10)     | 109.9(6) |
| C(11)-C(8)-C(10)    | 106.1(6) |
| C(8)-C(9)-H(9A)     | 109.5    |
| C(8)-C(9)-H(9B)     | 109.5    |
| H(9A)-C(9)-H(9B)    | 109.5    |
| C(8)-C(9)-H(9C)     | 109.5    |
| H(9A)-C(9)-H(9C)    | 109.5    |
| H(9B)-C(9)-H(9C)    | 109.5    |
| C(8)-C(10)-H(10A)   | 109.5    |
| C(8)-C(10)-H(10B)   | 109.5    |
| H(10A)-C(10)-H(10B) | 109.5    |
| C(8)-C(10)-H(10C)   | 109.5    |
| H(10A)-C(10)-H(10C) | 109.5    |
| H(10B)-C(10)-H(10C) | 109.5    |
| C(8)-C(11)-H(11A)   | 109.5    |
| C(8)-C(11)-H(11B)   | 109.5    |
| H(11A)-C(11)-H(11B) | 109.5    |
| C(8)-C(11)-H(11C)   | 109.5    |
| H(11A)-C(11)-H(11C) | 109.5    |
| H(11B)-C(11)-H(11C) | 109.5    |
| C(17)-C(12)-C(13)   | 122.7(6) |
| C(17)-C(12)-S       | 118.5(5) |
| C(13)-C(12)-S       | 118.8(5) |
| O(2)-C(13)-C(12)    | 121.8(6) |
| O(2)-C(13)-C(14)    | 120.7(6) |
| C(12)-C(13)-C(14)   | 117.5(6) |
| C(15)-C(14)-C(13)   | 118.0(6) |
| C(15)-C(14)-C(19)   | 121.2(6) |
| C(13)-C(14)-C(19)   | 120.8(6) |
| C(14)-C(15)-C(16)   | 124.5(6) |

|                     |          |
|---------------------|----------|
| C(14)-C(15)-H(15)   | 117.8    |
| C(16)-C(15)-H(15)   | 117.8    |
| C(17)-C(16)-C(15)   | 116.8(6) |
| C(17)-C(16)-C(18)   | 122.4(7) |
| C(15)-C(16)-C(18)   | 120.7(7) |
| C(16)-C(17)-C(12)   | 120.5(7) |
| C(16)-C(17)-H(17)   | 119.7    |
| C(12)-C(17)-H(17)   | 119.7    |
| C(16)-C(18)-H(18A)  | 109.5    |
| C(16)-C(18)-H(18B)  | 109.5    |
| H(18A)-C(18)-H(18B) | 109.5    |
| C(16)-C(18)-H(18C)  | 109.5    |
| H(18A)-C(18)-H(18C) | 109.5    |
| H(18B)-C(18)-H(18C) | 109.5    |
| C(14)-C(19)-C(20)   | 109.8(6) |
| C(14)-C(19)-C(21)   | 109.8(6) |
| C(20)-C(19)-C(21)   | 110.5(6) |
| C(14)-C(19)-C(22)   | 113.6(6) |
| C(20)-C(19)-C(22)   | 106.8(7) |
| C(21)-C(19)-C(22)   | 106.2(7) |
| C(19)-C(20)-H(20A)  | 109.5    |
| C(19)-C(20)-H(20B)  | 109.5    |
| H(20A)-C(20)-H(20B) | 109.5    |
| C(19)-C(20)-H(20C)  | 109.5    |
| H(20A)-C(20)-H(20C) | 109.5    |
| H(20B)-C(20)-H(20C) | 109.5    |
| C(19)-C(21)-H(21A)  | 109.5    |
| C(19)-C(21)-H(21B)  | 109.5    |
| H(21A)-C(21)-H(21B) | 109.5    |
| C(19)-C(21)-H(21C)  | 109.5    |
| H(21A)-C(21)-H(21C) | 109.5    |
| H(21B)-C(21)-H(21C) | 109.5    |
| C(19)-C(22)-H(22A)  | 109.5    |
| C(19)-C(22)-H(22B)  | 109.5    |



|                     |          |
|---------------------|----------|
| H(22A)-C(22)-H(22B) | 109.5    |
| C(19)-C(22)-H(22C)  | 109.5    |
| H(22A)-C(22)-H(22C) | 109.5    |
| H(22B)-C(22)-H(22C) | 109.5    |
| Si-C(23)-Lu         | 129.5(4) |
| Si-C(23)-H(23A)     | 104.9    |
| Lu-C(23)-H(23A)     | 104.9    |
| Si-C(23)-H(23B)     | 104.9    |
| Lu-C(23)-H(23B)     | 104.9    |
| H(23A)-C(23)-H(23B) | 105.8    |
| Si-C(24)-H(24A)     | 109.5    |
| Si-C(24)-H(24B)     | 109.5    |
| H(24A)-C(24)-H(24B) | 109.5    |
| Si-C(24)-H(24C)     | 109.5    |
| H(24A)-C(24)-H(24C) | 109.5    |
| H(24B)-C(24)-H(24C) | 109.5    |
| Si-C(25)-H(25A)     | 109.5    |
| Si-C(25)-H(25B)     | 109.5    |
| H(25A)-C(25)-H(25B) | 109.5    |
| Si-C(25)-H(25C)     | 109.5    |
| H(25A)-C(25)-H(25C) | 109.5    |
| H(25B)-C(25)-H(25C) | 109.5    |
| Si-C(26)-H(26A)     | 109.5    |
| Si-C(26)-H(26B)     | 109.5    |
| H(26A)-C(26)-H(26B) | 109.5    |
| Si-C(26)-H(26C)     | 109.5    |
| H(26A)-C(26)-H(26C) | 109.5    |
| H(26B)-C(26)-H(26C) | 109.5    |
| O(3)-C(27)-C(28)    | 105.2(7) |
| O(3)-C(27)-H(27A)   | 110.7    |
| C(28)-C(27)-H(27A)  | 110.7    |
| O(3)-C(27)-H(27B)   | 110.7    |
| C(28)-C(27)-H(27B)  | 110.7    |
| H(27A)-C(27)-H(27B) | 108.8    |

|                     |          |
|---------------------|----------|
| C(27)-C(28)-C(29)   | 101.9(7) |
| C(27)-C(28)-H(28A)  | 111.4    |
| C(29)-C(28)-H(28A)  | 111.4    |
| C(27)-C(28)-H(28B)  | 111.4    |
| C(29)-C(28)-H(28B)  | 111.4    |
| H(28A)-C(28)-H(28B) | 109.3    |
| C(30)-C(29)-C(28)   | 103.8(7) |
| C(30)-C(29)-H(29A)  | 111.0    |
| C(28)-C(29)-H(29A)  | 111.0    |
| C(30)-C(29)-H(29B)  | 111.0    |
| C(28)-C(29)-H(29B)  | 111.0    |
| H(29A)-C(29)-H(29B) | 109.0    |
| O(3)-C(30)-C(29)    | 105.8(7) |
| O(3)-C(30)-H(30A)   | 110.6    |
| C(29)-C(30)-H(30A)  | 110.6    |
| O(3)-C(30)-H(30B)   | 110.6    |
| C(29)-C(30)-H(30B)  | 110.6    |
| H(30A)-C(30)-H(30B) | 108.7    |
| O(4)-C(31)-C(32)    | 105.2(6) |
| O(4)-C(31)-H(31A)   | 110.7    |
| C(32)-C(31)-H(31A)  | 110.7    |
| O(4)-C(31)-H(31B)   | 110.7    |
| C(32)-C(31)-H(31B)  | 110.7    |
| H(31A)-C(31)-H(31B) | 108.8    |
| C(31)-C(32)-C(33)   | 103.4(6) |
| C(31)-C(32)-H(32A)  | 111.1    |
| C(33)-C(32)-H(32A)  | 111.1    |
| C(31)-C(32)-H(32B)  | 111.1    |
| C(33)-C(32)-H(32B)  | 111.1    |
| H(32A)-C(32)-H(32B) | 109.1    |
| C(34)-C(33)-C(32)   | 98.8(6)  |
| C(34)-C(33)-H(33A)  | 112.0    |
| C(32)-C(33)-H(33A)  | 112.0    |
| C(34)-C(33)-H(33B)  | 112.0    |

|                     |          |
|---------------------|----------|
| C(32)-C(33)-H(33B)  | 112.0    |
| H(33A)-C(33)-H(33B) | 109.7    |
| O(4)-C(34)-C(33)    | 107.2(7) |
| O(4)-C(34)-H(34A)   | 110.3    |
| C(33)-C(34)-H(34A)  | 110.3    |
| O(4)-C(34)-H(34B)   | 110.3    |
| C(33)-C(34)-H(34B)  | 110.3    |
| H(34A)-C(34)-H(34B) | 108.5    |

**Table 2.1 Crystal data and structure refinement for [Lu(tbbp)(CH<sub>2</sub>SiMe<sub>3</sub>)(THF)<sub>2</sub>] (1<sup>tBu</sup>).**

|                                 |                                                      |                |
|---------------------------------|------------------------------------------------------|----------------|
| Identification code             | mk1_tBu                                              |                |
| Empirical formula               | C <sub>40</sub> H <sub>67</sub> LuO <sub>4</sub> SSi |                |
| Formula weight                  | 847.06                                               |                |
| Temperature                     | 273(2) K                                             |                |
| Wavelength                      | 0.71073 Å                                            |                |
| Crystal system                  | Monoclinic                                           |                |
| Space group                     | P 1 21/c 1                                           |                |
| Unit cell dimensions            | a = 10.820(3) Å                                      | α = 90°        |
|                                 | b = 23.858(6) Å                                      | β = 93.261(4)° |
|                                 | c = 16.458(4) Å                                      | γ = 90°        |
| Volume                          | 4241.6(19) Å <sup>3</sup>                            |                |
| Z                               | 4                                                    |                |
| Density (calculated)            | 1.326 Mg/m <sup>3</sup>                              |                |
| Absorption coefficient          | 2.440 mm <sup>-1</sup>                               |                |
| F(000)                          | 1760                                                 |                |
| Crystal size                    | 0.53×0.21×0.12 mm <sup>3</sup>                       |                |
| Theta range for data collection | 2.36 to 28.37°                                       |                |
| Index ranges                    | -14≤h≤13, -31≤k≤31, -21≤l≤21                         |                |
| Reflections collected           | 43156                                                |                |
| Independent reflections         | 10572 [R(int) = 0.0563]                              |                |
| Completeness to theta = 28.37°  | 99.7 %                                               |                |
| Absorption correction           | Empirical                                            |                |
| Max. and min. transmission      | 1.0000 and 0.6637                                    |                |

|                                      |                                    |
|--------------------------------------|------------------------------------|
| Refinement method                    | Full-matrix least-squares on $F^2$ |
| Data / restraints / parameters       | 10572 / 0 / 439                    |
| Goodness-of-fit on $F^2$             | 1.014                              |
| Final R indices [ $I > 2\sigma(I)$ ] | R1 = 0.0313, wR2 = 0.0697          |
| R indices (all data)                 | R1 = 0.0448, wR2 = 0.0748          |
| Largest diff. peak and hole          | 1.191 and -0.907 e.Å <sup>-3</sup> |

**Table 2.2 Bond lengths [Å] and angles [°] for mk1\_tBu.**

---

|            |            |
|------------|------------|
| Si-C(29)   | 1.841(3)   |
| Si-C(31)   | 1.868(3)   |
| Si-C(30)   | 1.880(4)   |
| Si-C(32)   | 1.882(3)   |
| S-C(2)     | 1.793(3)   |
| S-C(15)    | 1.793(3)   |
| S-Lu       | 2.9066(10) |
| Lu-O(2)    | 2.103(2)   |
| Lu-O(1)    | 2.118(2)   |
| Lu-O(3)    | 2.325(2)   |
| Lu-O(4)    | 2.368(2)   |
| Lu-C(29)   | 2.375(3)   |
| O(1)-C(1)  | 1.337(3)   |
| O(2)-C(16) | 1.334(3)   |
| O(3)-C(36) | 1.447(4)   |
| O(3)-C(33) | 1.455(4)   |
| O(4)-C(40) | 1.462(4)   |
| O(4)-C(37) | 1.479(3)   |
| C(1)-C(2)  | 1.414(4)   |
| C(1)-C(6)  | 1.430(4)   |
| C(2)-C(3)  | 1.399(4)   |
| C(3)-C(4)  | 1.385(4)   |
| C(3)-H(3)  | 0.9300     |
| C(4)-C(5)  | 1.411(4)   |
| C(4)-C(7)  | 1.533(4)   |

|              |          |
|--------------|----------|
| C(5)-C(6)    | 1.393(4) |
| C(5)-H(5)    | 0.9300   |
| C(6)-C(11)   | 1.544(4) |
| C(7)-C(8)    | 1.529(4) |
| C(7)-C(9)    | 1.534(4) |
| C(7)-C(10)   | 1.545(4) |
| C(8)-H(8A)   | 0.9600   |
| C(8)-H(8B)   | 0.9600   |
| C(8)-H(8C)   | 0.9600   |
| C(9)-H(9A)   | 0.9600   |
| C(9)-H(9B)   | 0.9600   |
| C(9)-H(9C)   | 0.9600   |
| C(10)-H(10A) | 0.9600   |
| C(10)-H(10B) | 0.9600   |
| C(10)-H(10C) | 0.9600   |
| C(11)-C(14)  | 1.538(4) |
| C(11)-C(12)  | 1.539(4) |
| C(11)-C(13)  | 1.543(4) |
| C(12)-H(12A) | 0.9600   |
| C(12)-H(12B) | 0.9600   |
| C(12)-H(12C) | 0.9600   |
| C(13)-H(13A) | 0.9600   |
| C(13)-H(13B) | 0.9600   |
| C(13)-H(13C) | 0.9600   |
| C(14)-H(14A) | 0.9600   |
| C(14)-H(14B) | 0.9600   |
| C(14)-H(14C) | 0.9600   |
| C(15)-C(20)  | 1.392(4) |
| C(15)-C(16)  | 1.412(4) |
| C(16)-C(17)  | 1.426(4) |
| C(17)-C(18)  | 1.397(4) |
| C(17)-C(25)  | 1.539(4) |
| C(18)-C(19)  | 1.413(4) |
| C(18)-H(18)  | 0.9300   |

|              |          |
|--------------|----------|
| C(19)-C(20)  | 1.392(4) |
| C(19)-C(21)  | 1.536(4) |
| C(20)-H(20)  | 0.9300   |
| C(21)-C(22)  | 1.534(5) |
| C(21)-C(24)  | 1.539(4) |
| C(21)-C(23)  | 1.541(4) |
| C(22)-H(22A) | 0.9600   |
| C(22)-H(22B) | 0.9600   |
| C(22)-H(22C) | 0.9600   |
| C(23)-H(23A) | 0.9600   |
| C(23)-H(23B) | 0.9600   |
| C(23)-H(23C) | 0.9600   |
| C(24)-H(24A) | 0.9600   |
| C(24)-H(24B) | 0.9600   |
| C(24)-H(24C) | 0.9600   |
| C(25)-C(27)  | 1.538(4) |
| C(25)-C(26)  | 1.539(4) |
| C(25)-C(28)  | 1.546(4) |
| C(26)-H(26A) | 0.9600   |
| C(26)-H(26B) | 0.9600   |
| C(26)-H(26C) | 0.9600   |
| C(27)-H(27A) | 0.9600   |
| C(27)-H(27B) | 0.9600   |
| C(27)-H(27C) | 0.9600   |
| C(28)-H(28A) | 0.9600   |
| C(28)-H(28B) | 0.9600   |
| C(28)-H(28C) | 0.9600   |
| C(29)-H(29A) | 0.9700   |
| C(29)-H(29B) | 0.9700   |
| C(30)-H(30A) | 0.9600   |
| C(30)-H(30B) | 0.9600   |
| C(30)-H(30C) | 0.9600   |
| C(31)-H(31A) | 0.9600   |
| C(31)-H(31B) | 0.9600   |

|                |            |
|----------------|------------|
| C(31)-H(31C)   | 0.9600     |
| C(32)-H(32A)   | 0.9600     |
| C(32)-H(32B)   | 0.9600     |
| C(32)-H(32C)   | 0.9600     |
| C(33)-C(34)    | 1.519(5)   |
| C(33)-H(33A)   | 0.9700     |
| C(33)-H(33B)   | 0.9700     |
| C(34)-C(35)    | 1.515(5)   |
| C(34)-H(34A)   | 0.9700     |
| C(34)-H(34B)   | 0.9700     |
| C(35)-C(36)    | 1.513(5)   |
| C(35)-H(35A)   | 0.9700     |
| C(35)-H(35B)   | 0.9700     |
| C(36)-H(36A)   | 0.9700     |
| C(36)-H(36B)   | 0.9700     |
| C(37)-C(38)    | 1.483(5)   |
| C(37)-H(37A)   | 0.9700     |
| C(37)-H(37B)   | 0.9700     |
| C(38)-C(39)    | 1.452(6)   |
| C(38)-H(38A)   | 0.9700     |
| C(38)-H(38B)   | 0.9700     |
| C(39)-C(40)    | 1.502(4)   |
| C(39)-H(39A)   | 0.9700     |
| C(39)-H(39B)   | 0.9700     |
| C(40)-H(40A)   | 0.9700     |
| C(40)-H(40B)   | 0.9700     |
| <br>           |            |
| C(29)-Si-C(31) | 108.37(16) |
| C(29)-Si-C(30) | 110.97(17) |
| C(31)-Si-C(30) | 109.56(18) |
| C(29)-Si-C(32) | 116.02(15) |
| C(31)-Si-C(32) | 107.16(16) |
| C(30)-Si-C(32) | 104.56(18) |
| C(2)-S-C(15)   | 103.54(12) |

|                  |            |
|------------------|------------|
| C(2)-S-Lu        | 94.27(10)  |
| C(15)-S-Lu       | 94.68(10)  |
| O(2)-Lu-O(1)     | 98.43(8)   |
| O(2)-Lu-O(3)     | 85.13(8)   |
| O(1)-Lu-O(3)     | 158.10(8)  |
| O(2)-Lu-O(4)     | 145.53(8)  |
| O(1)-Lu-O(4)     | 86.42(7)   |
| O(3)-Lu-O(4)     | 78.90(7)   |
| O(2)-Lu-C(29)    | 99.96(9)   |
| O(1)-Lu-C(29)    | 108.00(10) |
| O(3)-Lu-C(29)    | 92.50(10)  |
| O(4)-Lu-C(29)    | 110.99(9)  |
| O(2)-Lu-S        | 71.05(6)   |
| O(1)-Lu-S        | 71.77(6)   |
| O(3)-Lu-S        | 89.27(6)   |
| O(4)-Lu-S        | 78.34(5)   |
| C(29)-Lu-S       | 170.67(8)  |
| C(1)-O(1)-Lu     | 133.37(18) |
| C(16)-O(2)-Lu    | 134.31(17) |
| C(36)-O(3)-C(33) | 106.1(2)   |
| C(36)-O(3)-Lu    | 123.28(19) |
| C(33)-O(3)-Lu    | 129.33(18) |
| C(40)-O(4)-C(37) | 106.9(2)   |
| C(40)-O(4)-Lu    | 125.04(17) |
| C(37)-O(4)-Lu    | 122.41(16) |
| O(1)-C(1)-C(2)   | 120.6(2)   |
| O(1)-C(1)-C(6)   | 121.7(3)   |
| C(2)-C(1)-C(6)   | 117.7(3)   |
| C(3)-C(2)-C(1)   | 121.9(3)   |
| C(3)-C(2)-S      | 118.3(2)   |
| C(1)-C(2)-S      | 119.8(2)   |
| C(4)-C(3)-C(2)   | 121.5(3)   |
| C(4)-C(3)-H(3)   | 119.2      |
| C(2)-C(3)-H(3)   | 119.2      |



|                     |          |
|---------------------|----------|
| C(3)-C(4)-C(5)      | 116.2(3) |
| C(3)-C(4)-C(7)      | 123.9(3) |
| C(5)-C(4)-C(7)      | 119.9(2) |
| C(6)-C(5)-C(4)      | 124.8(3) |
| C(6)-C(5)-H(5)      | 117.6    |
| C(4)-C(5)-H(5)      | 117.6    |
| C(5)-C(6)-C(1)      | 117.9(3) |
| C(5)-C(6)-C(11)     | 121.3(3) |
| C(1)-C(6)-C(11)     | 120.8(3) |
| C(8)-C(7)-C(4)      | 112.5(2) |
| C(8)-C(7)-C(9)      | 108.4(3) |
| C(4)-C(7)-C(9)      | 110.4(2) |
| C(8)-C(7)-C(10)     | 108.4(3) |
| C(4)-C(7)-C(10)     | 108.4(2) |
| C(9)-C(7)-C(10)     | 108.7(3) |
| C(7)-C(8)-H(8A)     | 109.5    |
| C(7)-C(8)-H(8B)     | 109.5    |
| H(8A)-C(8)-H(8B)    | 109.5    |
| C(7)-C(8)-H(8C)     | 109.5    |
| H(8A)-C(8)-H(8C)    | 109.5    |
| H(8B)-C(8)-H(8C)    | 109.5    |
| C(7)-C(9)-H(9A)     | 109.5    |
| C(7)-C(9)-H(9B)     | 109.5    |
| H(9A)-C(9)-H(9B)    | 109.5    |
| C(7)-C(9)-H(9C)     | 109.5    |
| H(9A)-C(9)-H(9C)    | 109.5    |
| H(9B)-C(9)-H(9C)    | 109.5    |
| C(7)-C(10)-H(10A)   | 109.5    |
| C(7)-C(10)-H(10B)   | 109.5    |
| H(10A)-C(10)-H(10B) | 109.5    |
| C(7)-C(10)-H(10C)   | 109.5    |
| H(10A)-C(10)-H(10C) | 109.5    |
| H(10B)-C(10)-H(10C) | 109.5    |
| C(14)-C(11)-C(12)   | 106.9(3) |

|                     |          |
|---------------------|----------|
| C(14)-C(11)-C(13)   | 110.3(3) |
| C(12)-C(11)-C(13)   | 107.8(3) |
| C(14)-C(11)-C(6)    | 109.9(2) |
| C(12)-C(11)-C(6)    | 112.2(3) |
| C(13)-C(11)-C(6)    | 109.7(2) |
| C(11)-C(12)-H(12A)  | 109.5    |
| C(11)-C(12)-H(12B)  | 109.5    |
| H(12A)-C(12)-H(12B) | 109.5    |
| C(11)-C(12)-H(12C)  | 109.5    |
| H(12A)-C(12)-H(12C) | 109.5    |
| H(12B)-C(12)-H(12C) | 109.5    |
| C(11)-C(13)-H(13A)  | 109.5    |
| C(11)-C(13)-H(13B)  | 109.5    |
| H(13A)-C(13)-H(13B) | 109.5    |
| C(11)-C(13)-H(13C)  | 109.5    |
| H(13A)-C(13)-H(13C) | 109.5    |
| H(13B)-C(13)-H(13C) | 109.5    |
| C(11)-C(14)-H(14A)  | 109.5    |
| C(11)-C(14)-H(14B)  | 109.5    |
| H(14A)-C(14)-H(14B) | 109.5    |
| C(11)-C(14)-H(14C)  | 109.5    |
| H(14A)-C(14)-H(14C) | 109.5    |
| H(14B)-C(14)-H(14C) | 109.5    |
| C(20)-C(15)-C(16)   | 122.5(3) |
| C(20)-C(15)-S       | 118.6(2) |
| C(16)-C(15)-S       | 118.9(2) |
| O(2)-C(16)-C(15)    | 120.4(2) |
| O(2)-C(16)-C(17)    | 122.1(3) |
| C(15)-C(16)-C(17)   | 117.5(3) |
| C(18)-C(17)-C(16)   | 117.9(3) |
| C(18)-C(17)-C(25)   | 121.5(3) |
| C(16)-C(17)-C(25)   | 120.6(3) |
| C(17)-C(18)-C(19)   | 124.7(3) |
| C(17)-C(18)-H(18)   | 117.6    |

|                     |          |
|---------------------|----------|
| C(19)-C(18)-H(18)   | 117.6    |
| C(20)-C(19)-C(18)   | 116.1(3) |
| C(20)-C(19)-C(21)   | 123.3(3) |
| C(18)-C(19)-C(21)   | 120.7(3) |
| C(15)-C(20)-C(19)   | 121.2(3) |
| C(15)-C(20)-H(20)   | 119.4    |
| C(19)-C(20)-H(20)   | 119.4    |
| C(22)-C(21)-C(19)   | 112.2(3) |
| C(22)-C(21)-C(24)   | 107.9(3) |
| C(19)-C(21)-C(24)   | 110.7(3) |
| C(22)-C(21)-C(23)   | 108.9(3) |
| C(19)-C(21)-C(23)   | 108.4(3) |
| C(24)-C(21)-C(23)   | 108.8(3) |
| C(21)-C(22)-H(22A)  | 109.5    |
| C(21)-C(22)-H(22B)  | 109.5    |
| H(22A)-C(22)-H(22B) | 109.5    |
| C(21)-C(22)-H(22C)  | 109.5    |
| H(22A)-C(22)-H(22C) | 109.5    |
| H(22B)-C(22)-H(22C) | 109.5    |
| C(21)-C(23)-H(23A)  | 109.5    |
| C(21)-C(23)-H(23B)  | 109.5    |
| H(23A)-C(23)-H(23B) | 109.5    |
| C(21)-C(23)-H(23C)  | 109.5    |
| H(23A)-C(23)-H(23C) | 109.5    |
| H(23B)-C(23)-H(23C) | 109.5    |
| C(21)-C(24)-H(24A)  | 109.5    |
| C(21)-C(24)-H(24B)  | 109.5    |
| H(24A)-C(24)-H(24B) | 109.5    |
| C(21)-C(24)-H(24C)  | 109.5    |
| H(24A)-C(24)-H(24C) | 109.5    |
| H(24B)-C(24)-H(24C) | 109.5    |
| C(27)-C(25)-C(26)   | 107.9(3) |
| C(27)-C(25)-C(17)   | 109.1(2) |
| C(26)-C(25)-C(17)   | 112.5(3) |

|                     |            |
|---------------------|------------|
| C(27)-C(25)-C(28)   | 109.6(3)   |
| C(26)-C(25)-C(28)   | 106.7(3)   |
| C(17)-C(25)-C(28)   | 111.0(2)   |
| C(25)-C(26)-H(26A)  | 109.5      |
| C(25)-C(26)-H(26B)  | 109.5      |
| H(26A)-C(26)-H(26B) | 109.5      |
| C(25)-C(26)-H(26C)  | 109.5      |
| H(26A)-C(26)-H(26C) | 109.5      |
| H(26B)-C(26)-H(26C) | 109.5      |
| C(25)-C(27)-H(27A)  | 109.5      |
| C(25)-C(27)-H(27B)  | 109.5      |
| H(27A)-C(27)-H(27B) | 109.5      |
| C(25)-C(27)-H(27C)  | 109.5      |
| H(27A)-C(27)-H(27C) | 109.5      |
| H(27B)-C(27)-H(27C) | 109.5      |
| C(25)-C(28)-H(28A)  | 109.5      |
| C(25)-C(28)-H(28B)  | 109.5      |
| H(28A)-C(28)-H(28B) | 109.5      |
| C(25)-C(28)-H(28C)  | 109.5      |
| H(28A)-C(28)-H(28C) | 109.5      |
| H(28B)-C(28)-H(28C) | 109.5      |
| Si-C(29)-Lu         | 125.59(16) |
| Si-C(29)-H(29A)     | 105.9      |
| Lu-C(29)-H(29A)     | 105.9      |
| Si-C(29)-H(29B)     | 105.9      |
| Lu-C(29)-H(29B)     | 105.9      |
| H(29A)-C(29)-H(29B) | 106.2      |
| Si-C(30)-H(30A)     | 109.5      |
| Si-C(30)-H(30B)     | 109.5      |
| H(30A)-C(30)-H(30B) | 109.5      |
| Si-C(30)-H(30C)     | 109.5      |
| H(30A)-C(30)-H(30C) | 109.5      |
| H(30B)-C(30)-H(30C) | 109.5      |
| Si-C(31)-H(31A)     | 109.5      |

|                     |          |
|---------------------|----------|
| Si-C(31)-H(31B)     | 109.5    |
| H(31A)-C(31)-H(31B) | 109.5    |
| Si-C(31)-H(31C)     | 109.5    |
| H(31A)-C(31)-H(31C) | 109.5    |
| H(31B)-C(31)-H(31C) | 109.5    |
| Si-C(32)-H(32A)     | 109.5    |
| Si-C(32)-H(32B)     | 109.5    |
| H(32A)-C(32)-H(32B) | 109.5    |
| Si-C(32)-H(32C)     | 109.5    |
| H(32A)-C(32)-H(32C) | 109.5    |
| H(32B)-C(32)-H(32C) | 109.5    |
| O(3)-C(33)-C(34)    | 104.4(3) |
| O(3)-C(33)-H(33A)   | 110.9    |
| C(34)-C(33)-H(33A)  | 110.9    |
| O(3)-C(33)-H(33B)   | 110.9    |
| C(34)-C(33)-H(33B)  | 110.9    |
| H(33A)-C(33)-H(33B) | 108.9    |
| C(35)-C(34)-C(33)   | 105.5(3) |
| C(35)-C(34)-H(34A)  | 110.6    |
| C(33)-C(34)-H(34A)  | 110.6    |
| C(35)-C(34)-H(34B)  | 110.6    |
| C(33)-C(34)-H(34B)  | 110.6    |
| H(34A)-C(34)-H(34B) | 108.8    |
| C(36)-C(35)-C(34)   | 105.1(3) |
| C(36)-C(35)-H(35A)  | 110.7    |
| C(34)-C(35)-H(35A)  | 110.7    |
| C(36)-C(35)-H(35B)  | 110.7    |
| C(34)-C(35)-H(35B)  | 110.7    |
| H(35A)-C(35)-H(35B) | 108.8    |
| O(3)-C(36)-C(35)    | 105.9(3) |
| O(3)-C(36)-H(36A)   | 110.5    |
| C(35)-C(36)-H(36A)  | 110.5    |
| O(3)-C(36)-H(36B)   | 110.5    |
| C(35)-C(36)-H(36B)  | 110.5    |

|                     |          |
|---------------------|----------|
| H(36A)-C(36)-H(36B) | 108.7    |
| O(4)-C(37)-C(38)    | 106.4(3) |
| O(4)-C(37)-H(37A)   | 110.5    |
| C(38)-C(37)-H(37A)  | 110.5    |
| O(4)-C(37)-H(37B)   | 110.5    |
| C(38)-C(37)-H(37B)  | 110.5    |
| H(37A)-C(37)-H(37B) | 108.6    |
| C(39)-C(38)-C(37)   | 107.6(3) |
| C(39)-C(38)-H(38A)  | 110.2    |
| C(37)-C(38)-H(38A)  | 110.2    |
| C(39)-C(38)-H(38B)  | 110.2    |
| C(37)-C(38)-H(38B)  | 110.2    |
| H(38A)-C(38)-H(38B) | 108.5    |
| C(38)-C(39)-C(40)   | 103.9(3) |
| C(38)-C(39)-H(39A)  | 111.0    |
| C(40)-C(39)-H(39A)  | 111.0    |
| C(38)-C(39)-H(39B)  | 111.0    |
| C(40)-C(39)-H(39B)  | 111.0    |
| H(39A)-C(39)-H(39B) | 109.0    |
| O(4)-C(40)-C(39)    | 105.6(3) |
| O(4)-C(40)-H(40A)   | 110.6    |
| C(39)-C(40)-H(40A)  | 110.6    |
| O(4)-C(40)-H(40B)   | 110.6    |
| C(39)-C(40)-H(40B)  | 110.6    |
| H(40A)-C(40)-H(40B) | 108.8    |

**Table 3.1 Crystal data and structure refinement for [Lu(etbmp)(CH<sub>2</sub>SiMe<sub>3</sub>)(THF)] (2).**

|                     |                                                                    |
|---------------------|--------------------------------------------------------------------|
| Identification code | mk2                                                                |
| Empirical formula   | C <sub>32</sub> H <sub>51</sub> LuO <sub>3</sub> S <sub>2</sub> Si |
| Formula weight      | 750.94                                                             |
| Temperature         | 150(2) K                                                           |
| Wavelength          | 0.71073 Å                                                          |
| Crystal system      | Triclinic                                                          |
| Space group         | P -1                                                               |

|                                   |                                             |                            |
|-----------------------------------|---------------------------------------------|----------------------------|
| Unit cell dimensions              | a = 8.7517(17) Å                            | $\alpha = 75.023(4)^\circ$ |
|                                   | b = 12.703(2) Å                             | $\beta = 82.049(5)^\circ$  |
|                                   | c = 16.986(3) Å                             | $\gamma = 75.436(4)^\circ$ |
| Volume                            | 1760.1(6) Å <sup>3</sup>                    |                            |
| Z                                 | 2                                           |                            |
| Density (calculated)              | 1.417 Mg/m <sup>3</sup>                     |                            |
| Absorption coefficient            | 2.985 mm <sup>-1</sup>                      |                            |
| F(000)                            | 768                                         |                            |
| Crystal size                      | 0.29×0.21×0.05 mm <sup>3</sup>              |                            |
| Theta range for data collection   | 2.33 to 28.35°.                             |                            |
| Index ranges                      | -11≤h≤11, -16≤k≤16, -22≤l≤22                |                            |
| Reflections collected             | 24117                                       |                            |
| Independent reflections           | 8702 [R(int) = 0.0503]                      |                            |
| Completeness to theta = 28.35°    | 99.2 %                                      |                            |
| Absorption correction             | Empirical                                   |                            |
| Max. and min. transmission        | 0.8651 and 0.4781                           |                            |
| Refinement method                 | Full-matrix least-squares on F <sup>2</sup> |                            |
| Data / restraints / parameters    | 8702 / 0 / 363                              |                            |
| Goodness-of-fit on F <sup>2</sup> | 1.100                                       |                            |
| Final R indices [I>2sigma(I)]     | R1 = 0.0413, wR2 = 0.0843                   |                            |
| R indices (all data)              | R1 = 0.0482, wR2 = 0.0873                   |                            |
| Largest diff. peak and hole       | 1.379 and -1.011 e.Å <sup>-3</sup>          |                            |

**Table 3.2 Bond lengths [Å] and angles [°] for mk2.**

---

|            |            |
|------------|------------|
| Si-C(25)   | 1.844(5)   |
| Si-C(26)   | 1.867(5)   |
| Si-C(28)   | 1.870(5)   |
| Si-C(27)   | 1.879(5)   |
| S(1)-C(2)  | 1.777(4)   |
| S(1)-C(12) | 1.815(5)   |
| S(1)-Lu    | 2.9619(12) |
| S(2)-C(14) | 1.779(4)   |

|              |            |
|--------------|------------|
| S(2)-C(13)   | 1.825(5)   |
| S(2)-Lu      | 2.8461(12) |
| Lu-O(1)      | 2.101(3)   |
| Lu-O(2)      | 2.115(3)   |
| Lu-O(3)      | 2.234(3)   |
| Lu-C(25)     | 2.335(4)   |
| O(1)-C(1)    | 1.333(5)   |
| O(2)-C(15)   | 1.327(5)   |
| O(3)-C(32)   | 1.440(6)   |
| O(3)-C(29)   | 1.446(5)   |
| C(1)-C(2)    | 1.412(6)   |
| C(1)-C(6)    | 1.420(5)   |
| C(2)-C(3)    | 1.391(6)   |
| C(3)-C(4)    | 1.374(6)   |
| C(3)-H(3)    | 0.9500     |
| C(4)-C(5)    | 1.388(6)   |
| C(4)-C(7)    | 1.512(6)   |
| C(5)-C(6)    | 1.390(6)   |
| C(5)-H(5)    | 0.9500     |
| C(6)-C(8)    | 1.540(6)   |
| C(7)-H(7A)   | 0.9800     |
| C(7)-H(7B)   | 0.9800     |
| C(7)-H(7C)   | 0.9800     |
| C(8)-C(10)   | 1.530(6)   |
| C(8)-C(11)   | 1.535(6)   |
| C(8)-C(9)    | 1.535(6)   |
| C(9)-H(9A)   | 0.9800     |
| C(9)-H(9B)   | 0.9800     |
| C(9)-H(9C)   | 0.9800     |
| C(10)-H(10A) | 0.9800     |
| C(10)-H(10B) | 0.9800     |
| C(10)-H(10C) | 0.9800     |
| C(11)-H(11A) | 0.9800     |
| C(11)-H(11B) | 0.9800     |



|              |          |
|--------------|----------|
| C(11)-H(11C) | 0.9800   |
| C(12)-C(13)  | 1.498(6) |
| C(12)-H(12A) | 0.9900   |
| C(12)-H(12B) | 0.9900   |
| C(13)-H(13A) | 0.9900   |
| C(13)-H(13B) | 0.9900   |
| C(14)-C(19)  | 1.393(5) |
| C(14)-C(15)  | 1.412(5) |
| C(15)-C(16)  | 1.431(5) |
| C(16)-C(17)  | 1.382(6) |
| C(16)-C(21)  | 1.531(6) |
| C(17)-C(18)  | 1.404(6) |
| C(17)-H(17)  | 0.9500   |
| C(18)-C(19)  | 1.378(6) |
| C(18)-C(20)  | 1.505(6) |
| C(19)-H(19)  | 0.9500   |
| C(20)-H(20A) | 0.9800   |
| C(20)-H(20B) | 0.9800   |
| C(20)-H(20C) | 0.9800   |
| C(21)-C(23)  | 1.532(6) |
| C(21)-C(24)  | 1.533(5) |
| C(21)-C(22)  | 1.537(6) |
| C(22)-H(22A) | 0.9800   |
| C(22)-H(22B) | 0.9800   |
| C(22)-H(22C) | 0.9800   |
| C(23)-H(23A) | 0.9800   |
| C(23)-H(23B) | 0.9800   |
| C(23)-H(23C) | 0.9800   |
| C(24)-H(24A) | 0.9800   |
| C(24)-H(24B) | 0.9800   |
| C(24)-H(24C) | 0.9800   |
| C(25)-H(25A) | 0.9900   |
| C(25)-H(25B) | 0.9900   |
| C(26)-H(26A) | 0.9800   |

|                  |            |
|------------------|------------|
| C(26)-H(26B)     | 0.9800     |
| C(26)-H(26C)     | 0.9800     |
| C(27)-H(27A)     | 0.9800     |
| C(27)-H(27B)     | 0.9800     |
| C(27)-H(27C)     | 0.9800     |
| C(28)-H(28A)     | 0.9800     |
| C(28)-H(28B)     | 0.9800     |
| C(28)-H(28C)     | 0.9800     |
| C(29)-C(30)      | 1.489(7)   |
| C(29)-H(29A)     | 0.9900     |
| C(29)-H(29B)     | 0.9900     |
| C(30)-C(31)      | 1.497(8)   |
| C(30)-H(30A)     | 0.9900     |
| C(30)-H(30B)     | 0.9900     |
| C(31)-C(32)      | 1.427(7)   |
| C(31)-H(31A)     | 0.9900     |
| C(31)-H(31B)     | 0.9900     |
| C(32)-H(32A)     | 0.9900     |
| C(32)-H(32B)     | 0.9900     |
|                  |            |
| C(25)-Si-C(26)   | 110.7(2)   |
| C(25)-Si-C(28)   | 110.9(2)   |
| C(26)-Si-C(28)   | 108.4(2)   |
| C(25)-Si-C(27)   | 113.2(2)   |
| C(26)-Si-C(27)   | 106.6(3)   |
| C(28)-Si-C(27)   | 106.8(2)   |
| C(2)-S(1)-C(12)  | 101.2(2)   |
| C(2)-S(1)-Lu     | 95.44(14)  |
| C(12)-S(1)-Lu    | 104.10(15) |
| C(14)-S(2)-C(13) | 102.1(2)   |
| C(14)-S(2)-Lu    | 96.36(14)  |
| C(13)-S(2)-Lu    | 103.31(16) |
| O(1)-Lu-O(2)     | 147.93(11) |
| O(1)-Lu-O(3)     | 92.55(11)  |

|                  |            |
|------------------|------------|
| O(2)-Lu-O(3)     | 94.76(11)  |
| O(1)-Lu-C(25)    | 108.71(13) |
| O(2)-Lu-C(25)    | 101.10(13) |
| O(3)-Lu-C(25)    | 98.08(14)  |
| O(1)-Lu-S(2)     | 91.15(8)   |
| O(2)-Lu-S(2)     | 71.07(8)   |
| O(3)-Lu-S(2)     | 157.46(8)  |
| C(25)-Lu-S(2)    | 101.76(12) |
| O(1)-Lu-S(1)     | 68.62(8)   |
| O(2)-Lu-S(1)     | 80.72(8)   |
| O(3)-Lu-S(1)     | 86.42(8)   |
| C(25)-Lu-S(1)    | 174.95(11) |
| S(2)-Lu-S(1)     | 74.28(3)   |
| C(1)-O(1)-Lu     | 137.9(2)   |
| C(15)-O(2)-Lu    | 134.3(2)   |
| C(32)-O(3)-C(29) | 108.3(4)   |
| C(32)-O(3)-Lu    | 127.3(3)   |
| C(29)-O(3)-Lu    | 123.6(3)   |
| O(1)-C(1)-C(2)   | 119.7(4)   |
| O(1)-C(1)-C(6)   | 122.5(4)   |
| C(2)-C(1)-C(6)   | 117.9(4)   |
| C(3)-C(2)-C(1)   | 121.9(4)   |
| C(3)-C(2)-S(1)   | 119.9(3)   |
| C(1)-C(2)-S(1)   | 118.3(3)   |
| C(4)-C(3)-C(2)   | 120.6(4)   |
| C(4)-C(3)-H(3)   | 119.7      |
| C(2)-C(3)-H(3)   | 119.7      |
| C(3)-C(4)-C(5)   | 117.6(4)   |
| C(3)-C(4)-C(7)   | 121.6(4)   |
| C(5)-C(4)-C(7)   | 120.8(4)   |
| C(4)-C(5)-C(6)   | 124.5(4)   |
| C(4)-C(5)-H(5)   | 117.8      |
| C(6)-C(5)-H(5)   | 117.8      |
| C(5)-C(6)-C(1)   | 117.6(4)   |

|                     |          |
|---------------------|----------|
| C(5)-C(6)-C(8)      | 122.0(4) |
| C(1)-C(6)-C(8)      | 120.4(4) |
| C(4)-C(7)-H(7A)     | 109.5    |
| C(4)-C(7)-H(7B)     | 109.5    |
| H(7A)-C(7)-H(7B)    | 109.5    |
| C(4)-C(7)-H(7C)     | 109.5    |
| H(7A)-C(7)-H(7C)    | 109.5    |
| H(7B)-C(7)-H(7C)    | 109.5    |
| C(10)-C(8)-C(11)    | 107.6(4) |
| C(10)-C(8)-C(9)     | 110.9(4) |
| C(11)-C(8)-C(9)     | 107.3(4) |
| C(10)-C(8)-C(6)     | 109.4(3) |
| C(11)-C(8)-C(6)     | 111.6(4) |
| C(9)-C(8)-C(6)      | 110.1(3) |
| C(8)-C(9)-H(9A)     | 109.5    |
| C(8)-C(9)-H(9B)     | 109.5    |
| H(9A)-C(9)-H(9B)    | 109.5    |
| C(8)-C(9)-H(9C)     | 109.5    |
| H(9A)-C(9)-H(9C)    | 109.5    |
| H(9B)-C(9)-H(9C)    | 109.5    |
| C(8)-C(10)-H(10A)   | 109.5    |
| C(8)-C(10)-H(10B)   | 109.5    |
| H(10A)-C(10)-H(10B) | 109.5    |
| C(8)-C(10)-H(10C)   | 109.5    |
| H(10A)-C(10)-H(10C) | 109.5    |
| H(10B)-C(10)-H(10C) | 109.5    |
| C(8)-C(11)-H(11A)   | 109.5    |
| C(8)-C(11)-H(11B)   | 109.5    |
| H(11A)-C(11)-H(11B) | 109.5    |
| C(8)-C(11)-H(11C)   | 109.5    |
| H(11A)-C(11)-H(11C) | 109.5    |
| H(11B)-C(11)-H(11C) | 109.5    |
| C(13)-C(12)-S(1)    | 115.6(3) |
| C(13)-C(12)-H(12A)  | 108.4    |

|                     |          |
|---------------------|----------|
| S(1)-C(12)-H(12A)   | 108.4    |
| C(13)-C(12)-H(12B)  | 108.4    |
| S(1)-C(12)-H(12B)   | 108.4    |
| H(12A)-C(12)-H(12B) | 107.4    |
| C(12)-C(13)-S(2)    | 115.2(3) |
| C(12)-C(13)-H(13A)  | 108.5    |
| S(2)-C(13)-H(13A)   | 108.5    |
| C(12)-C(13)-H(13B)  | 108.5    |
| S(2)-C(13)-H(13B)   | 108.5    |
| H(13A)-C(13)-H(13B) | 107.5    |
| C(19)-C(14)-C(15)   | 122.1(4) |
| C(19)-C(14)-S(2)    | 119.6(3) |
| C(15)-C(14)-S(2)    | 118.3(3) |
| O(2)-C(15)-C(14)    | 119.8(3) |
| O(2)-C(15)-C(16)    | 122.4(4) |
| C(14)-C(15)-C(16)   | 117.8(4) |
| C(17)-C(16)-C(15)   | 117.7(4) |
| C(17)-C(16)-C(21)   | 122.2(4) |
| C(15)-C(16)-C(21)   | 120.1(4) |
| C(16)-C(17)-C(18)   | 124.4(4) |
| C(16)-C(17)-H(17)   | 117.8    |
| C(18)-C(17)-H(17)   | 117.8    |
| C(19)-C(18)-C(17)   | 117.4(4) |
| C(19)-C(18)-C(20)   | 121.6(4) |
| C(17)-C(18)-C(20)   | 120.9(4) |
| C(18)-C(19)-C(14)   | 120.5(4) |
| C(18)-C(19)-H(19)   | 119.8    |
| C(14)-C(19)-H(19)   | 119.8    |
| C(18)-C(20)-H(20A)  | 109.5    |
| C(18)-C(20)-H(20B)  | 109.5    |
| H(20A)-C(20)-H(20B) | 109.5    |
| C(18)-C(20)-H(20C)  | 109.5    |
| H(20A)-C(20)-H(20C) | 109.5    |
| H(20B)-C(20)-H(20C) | 109.5    |

|                     |          |
|---------------------|----------|
| C(16)-C(21)-C(23)   | 109.6(3) |
| C(16)-C(21)-C(24)   | 112.1(4) |
| C(23)-C(21)-C(24)   | 107.7(3) |
| C(16)-C(21)-C(22)   | 110.2(3) |
| C(23)-C(21)-C(22)   | 110.5(4) |
| C(24)-C(21)-C(22)   | 106.7(3) |
| C(21)-C(22)-H(22A)  | 109.5    |
| C(21)-C(22)-H(22B)  | 109.5    |
| H(22A)-C(22)-H(22B) | 109.5    |
| C(21)-C(22)-H(22C)  | 109.5    |
| H(22A)-C(22)-H(22C) | 109.5    |
| H(22B)-C(22)-H(22C) | 109.5    |
| C(21)-C(23)-H(23A)  | 109.5    |
| C(21)-C(23)-H(23B)  | 109.5    |
| H(23A)-C(23)-H(23B) | 109.5    |
| C(21)-C(23)-H(23C)  | 109.5    |
| H(23A)-C(23)-H(23C) | 109.5    |
| H(23B)-C(23)-H(23C) | 109.5    |
| C(21)-C(24)-H(24A)  | 109.5    |
| C(21)-C(24)-H(24B)  | 109.5    |
| H(24A)-C(24)-H(24B) | 109.5    |
| C(21)-C(24)-H(24C)  | 109.5    |
| H(24A)-C(24)-H(24C) | 109.5    |
| H(24B)-C(24)-H(24C) | 109.5    |
| Si-C(25)-Lu         | 127.9(2) |
| Si-C(25)-H(25A)     | 105.3    |
| Lu-C(25)-H(25A)     | 105.3    |
| Si-C(25)-H(25B)     | 105.3    |
| Lu-C(25)-H(25B)     | 105.3    |
| H(25A)-C(25)-H(25B) | 106.0    |
| Si-C(26)-H(26A)     | 109.5    |
| Si-C(26)-H(26B)     | 109.5    |
| H(26A)-C(26)-H(26B) | 109.5    |
| Si-C(26)-H(26C)     | 109.5    |

|                     |          |
|---------------------|----------|
| H(26A)-C(26)-H(26C) | 109.5    |
| H(26B)-C(26)-H(26C) | 109.5    |
| Si-C(27)-H(27A)     | 109.5    |
| Si-C(27)-H(27B)     | 109.5    |
| H(27A)-C(27)-H(27B) | 109.5    |
| Si-C(27)-H(27C)     | 109.5    |
| H(27A)-C(27)-H(27C) | 109.5    |
| H(27B)-C(27)-H(27C) | 109.5    |
| Si-C(28)-H(28A)     | 109.5    |
| Si-C(28)-H(28B)     | 109.5    |
| H(28A)-C(28)-H(28B) | 109.5    |
| Si-C(28)-H(28C)     | 109.5    |
| H(28A)-C(28)-H(28C) | 109.5    |
| H(28B)-C(28)-H(28C) | 109.5    |
| O(3)-C(29)-C(30)    | 107.0(4) |
| O(3)-C(29)-H(29A)   | 110.3    |
| C(30)-C(29)-H(29A)  | 110.3    |
| O(3)-C(29)-H(29B)   | 110.3    |
| C(30)-C(29)-H(29B)  | 110.3    |
| H(29A)-C(29)-H(29B) | 108.6    |
| C(29)-C(30)-C(31)   | 103.8(4) |
| C(29)-C(30)-H(30A)  | 111.0    |
| C(31)-C(30)-H(30A)  | 111.0    |
| C(29)-C(30)-H(30B)  | 111.0    |
| C(31)-C(30)-H(30B)  | 111.0    |
| H(30A)-C(30)-H(30B) | 109.0    |
| C(32)-C(31)-C(30)   | 106.3(5) |
| C(32)-C(31)-H(31A)  | 110.5    |
| C(30)-C(31)-H(31A)  | 110.5    |
| C(32)-C(31)-H(31B)  | 110.5    |
| C(30)-C(31)-H(31B)  | 110.5    |
| H(31A)-C(31)-H(31B) | 108.7    |
| C(31)-C(32)-O(3)    | 108.3(5) |
| C(31)-C(32)-H(32A)  | 110.0    |

|                     |       |
|---------------------|-------|
| O(3)-C(32)-H(32A)   | 110.0 |
| C(31)-C(32)-H(32B)  | 110.0 |
| O(3)-C(32)-H(32B)   | 110.0 |
| H(32A)-C(32)-H(32B) | 108.4 |

**Table 4.1 Crystal data and structure refinement for [Lu(tbmp)(OCPh<sub>3</sub>)(THF)<sub>2</sub>] (5).**

|                                   |                                                          |                 |
|-----------------------------------|----------------------------------------------------------|-----------------|
| Identification code               | mk5                                                      |                 |
| Empirical formula                 | C <sub>55.75</sub> H <sub>74</sub> LuO <sub>5.75</sub> S |                 |
| Formula weight                    | 1043.18                                                  |                 |
| Temperature                       | 153(2) K                                                 |                 |
| Wavelength                        | 0.71073 Å                                                |                 |
| Crystal system                    | Monoclinic                                               |                 |
| Space group                       | C 2/c                                                    |                 |
| Unit cell dimensions              | a = 33.017(5) Å                                          | α b = 90°       |
|                                   | b = 18.291(3) Å                                          | β = 108.832(3)° |
|                                   | c = 20.635(3) Å                                          | γ = 90°         |
| Volume                            | 11794(3) Å <sup>3</sup>                                  |                 |
| Z                                 | 8                                                        |                 |
| Density (calculated)              | 1.175 Mg/m <sup>3</sup>                                  |                 |
| Absorption coefficient            | 1.750 mm <sup>-1</sup>                                   |                 |
| F(000)                            | 4332                                                     |                 |
| Crystal size                      | 0.67×0.18×0.13 mm <sup>3</sup>                           |                 |
| Theta range for data collection   | 1.52 to 28.40°.                                          |                 |
| Index ranges                      | -44 ≤ h ≤ 44, -24 ≤ k ≤ 24, -27 ≤ l ≤ 27                 |                 |
| Reflections collected             | 80196                                                    |                 |
| Independent reflections           | 14774 [R(int) = 0.0954]                                  |                 |
| Completeness to theta = 28.40°    | 99.8 %                                                   |                 |
| Absorption correction             | Empirical                                                |                 |
| Max. and min. transmission        | 0.8044 and 0.3868                                        |                 |
| Refinement method                 | Full-matrix least-squares on F <sup>2</sup>              |                 |
| Data / restraints / parameters    | 14774 / 27 / 573                                         |                 |
| Goodness-of-fit on F <sup>2</sup> | 1.057                                                    |                 |
| Final R indices [I > 2σ(I)]       | R1 = 0.0501, wR2 = 0.1294                                |                 |



R indices (all data)

R1 = 0.0936, wR2 = 0.1488

Largest diff. peak and hole

1.116 and -0.547 e.Å<sup>-3</sup>

**Table 4.2 Bond lengths [Å] and angles [°] for mk5.**

---

|            |            |
|------------|------------|
| Lu-O(5)    | 2.016(3)   |
| Lu-O(2)    | 2.105(4)   |
| Lu-O(1)    | 2.116(4)   |
| Lu-O(3)    | 2.303(4)   |
| Lu-O(4)    | 2.319(4)   |
| Lu-S       | 2.8961(14) |
| S-C(2)     | 1.776(7)   |
| S-C(12)    | 1.793(6)   |
| O(1)-C(1)  | 1.324(6)   |
| O(2)-C(13) | 1.334(6)   |
| O(3)-C(45) | 1.386(9)   |
| O(3)-C(42) | 1.448(9)   |
| O(4)-C(49) | 1.429(8)   |
| O(4)-C(46) | 1.442(8)   |
| O(5)-C(23) | 1.394(6)   |
| C(1)-C(2)  | 1.399(8)   |
| C(1)-C(6)  | 1.422(8)   |
| C(2)-C(3)  | 1.402(8)   |
| C(3)-C(4)  | 1.376(11)  |
| C(3)-H(3)  | 0.9500     |
| C(4)-C(5)  | 1.398(12)  |
| C(4)-C(7)  | 1.507(10)  |
| C(5)-C(6)  | 1.399(9)   |
| C(5)-H(5)  | 0.9500     |
| C(6)-C(8)  | 1.517(10)  |
| C(7)-H(7A) | 0.9800     |
| C(7)-H(7B) | 0.9800     |
| C(7)-H(7C) | 0.9800     |
| C(8)-C(11) | 1.523(10)  |

|              |           |
|--------------|-----------|
| C(8)-C(9)    | 1.541(10) |
| C(8)-C(10)   | 1.543(9)  |
| C(9)-H(9A)   | 0.9800    |
| C(9)-H(9B)   | 0.9800    |
| C(9)-H(9C)   | 0.9800    |
| C(10)-H(10A) | 0.9800    |
| C(10)-H(10B) | 0.9800    |
| C(10)-H(10C) | 0.9800    |
| C(11)-H(11A) | 0.9800    |
| C(11)-H(11B) | 0.9800    |
| C(11)-H(11C) | 0.9800    |
| C(12)-C(17)  | 1.382(8)  |
| C(12)-C(13)  | 1.389(8)  |
| C(13)-C(14)  | 1.414(8)  |
| C(14)-C(15)  | 1.377(8)  |
| C(14)-C(19)  | 1.529(9)  |
| C(15)-C(16)  | 1.387(9)  |
| C(15)-H(15)  | 0.9500    |
| C(16)-C(17)  | 1.381(9)  |
| C(16)-C(18)  | 1.522(9)  |
| C(17)-H(17)  | 0.9500    |
| C(18)-H(18A) | 0.9800    |
| C(18)-H(18B) | 0.9800    |
| C(18)-H(18C) | 0.9800    |
| C(19)-C(21)  | 1.525(10) |
| C(19)-C(22)  | 1.551(9)  |
| C(19)-C(20)  | 1.573(9)  |
| C(20)-H(20A) | 0.9800    |
| C(20)-H(20B) | 0.9800    |
| C(20)-H(20C) | 0.9800    |
| C(21)-H(21A) | 0.9800    |
| C(21)-H(21B) | 0.9800    |
| C(21)-H(21C) | 0.9800    |
| C(22)-H(22A) | 0.9800    |

|              |           |
|--------------|-----------|
| C(22)-H(22B) | 0.9800    |
| C(22)-H(22C) | 0.9800    |
| C(23)-C(24)  | 1.533(7)  |
| C(23)-C(36)  | 1.534(7)  |
| C(23)-C(30)  | 1.549(7)  |
| C(24)-C(25)  | 1.371(8)  |
| C(24)-C(29)  | 1.391(8)  |
| C(25)-C(26)  | 1.385(8)  |
| C(25)-H(25)  | 0.9500    |
| C(26)-C(27)  | 1.368(9)  |
| C(26)-H(26)  | 0.9500    |
| C(27)-C(28)  | 1.372(10) |
| C(27)-H(27)  | 0.9500    |
| C(28)-C(29)  | 1.385(8)  |
| C(28)-H(28)  | 0.9500    |
| C(29)-H(29)  | 0.9500    |
| C(30)-C(35)  | 1.374(8)  |
| C(30)-C(31)  | 1.386(8)  |
| C(31)-C(32)  | 1.387(8)  |
| C(31)-H(31)  | 0.9500    |
| C(32)-C(33)  | 1.366(9)  |
| C(32)-H(32)  | 0.9500    |
| C(33)-C(34)  | 1.353(10) |
| C(33)-H(33)  | 0.9500    |
| C(34)-C(35)  | 1.391(9)  |
| C(34)-H(34)  | 0.9500    |
| C(35)-H(35)  | 0.9500    |
| C(36)-C(37)  | 1.386(8)  |
| C(36)-C(41)  | 1.393(8)  |
| C(37)-C(38)  | 1.395(8)  |
| C(37)-H(37)  | 0.9500    |
| C(38)-C(39)  | 1.374(10) |
| C(38)-H(38)  | 0.9500    |
| C(39)-C(40)  | 1.374(10) |

|              |           |
|--------------|-----------|
| C(39)-H(39)  | 0.9500    |
| C(40)-C(41)  | 1.376(8)  |
| C(40)-H(40)  | 0.9500    |
| C(41)-H(41)  | 0.9500    |
| C(42)-C(43)  | 1.429(12) |
| C(42)-H(42A) | 0.9900    |
| C(42)-H(42B) | 0.9900    |
| C(43)-C(44)  | 1.502(14) |
| C(43)-H(43A) | 0.9900    |
| C(43)-H(43B) | 0.9900    |
| C(44)-C(45)  | 1.464(11) |
| C(44)-H(44A) | 0.9900    |
| C(44)-H(44B) | 0.9900    |
| C(45)-H(45A) | 0.9900    |
| C(45)-H(45B) | 0.9900    |
| C(46)-C(47)  | 1.482(11) |
| C(46)-H(46A) | 0.9900    |
| C(46)-H(46B) | 0.9900    |
| C(47)-C(48)  | 1.400(15) |
| C(47)-H(47A) | 0.9900    |
| C(47)-H(47B) | 0.9900    |
| C(48)-C(49)  | 1.441(12) |
| C(48)-H(48A) | 0.9900    |
| C(48)-H(48B) | 0.9900    |
| C(49)-H(49A) | 0.9900    |
| C(49)-H(49B) | 0.9900    |
| C(50)-C(54)  | 1.508(19) |
| C(50)-C(51)  | 1.521(19) |
| C(50)-H(50A) | 0.9900    |
| C(50)-H(50B) | 0.9900    |
| C(51)-C(52)  | 1.592(19) |
| C(51)-C(54)  | 1.93(4)   |
| C(51)-H(51A) | 0.9900    |
| C(51)-H(51B) | 0.9900    |

|               |           |
|---------------|-----------|
| C(52)-C(53)   | 1.607(19) |
| C(52)-H(52A)  | 0.9900    |
| C(52)-H(52B)  | 0.9900    |
| C(53)-C(54)   | 1.574(19) |
| C(53)-H(53A)  | 0.9900    |
| C(53)-H(53B)  | 0.9900    |
| C(54)-H(54A)  | 0.9900    |
| C(54)-H(54B)  | 0.9900    |
| C(55)-C(56)#1 | 1.523(13) |
| C(55)-C(56)   | 1.523(13) |
| C(55)-H(55A)  | 0.9900    |
| C(55)-H(55B)  | 0.9900    |
| C(56)-C(57)   | 1.534(19) |
| C(56)-H(56A)  | 0.9900    |
| C(56)-H(56B)  | 0.9900    |
| C(57)-C(57)#1 | 1.53(2)   |
| C(57)-H(57A)  | 0.9900    |
| C(57)-H(57B)  | 0.9900    |
| C(58)-C(59)   | 1.540(18) |
| C(58)-H(58A)  | 0.9800    |
| C(58)-H(58B)  | 0.9800    |
| C(58)-H(58C)  | 0.9800    |
| C(59)-C(60)   | 1.481(18) |
| C(59)-H(59A)  | 0.9900    |
| C(59)-H(59B)  | 0.9900    |
| C(60)-C(61)   | 1.544(17) |
| C(60)-H(60A)  | 0.9900    |
| C(60)-H(60B)  | 0.9900    |
| C(61)-C(62)   | 1.542(18) |
| C(61)-H(61A)  | 0.9900    |
| C(61)-H(61B)  | 0.9900    |
| C(62)-H(62A)  | 0.9800    |
| C(62)-H(62B)  | 0.9800    |
| C(62)-H(62C)  | 0.9800    |

|                  |            |
|------------------|------------|
| C(63)-C(64)      | 1.448(13)  |
| C(63)-C(64)#1    | 1.448(13)  |
| C(63)-H(63A)     | 0.9900     |
| C(63)-H(63B)     | 0.9900     |
| C(64)-C(65)      | 1.520(17)  |
| C(64)-H(64A)     | 0.9900     |
| C(64)-H(64B)     | 0.9900     |
| C(65)-H(65A)     | 0.9800     |
| C(65)-H(65B)     | 0.9800     |
| C(65)-H(65C)     | 0.9800     |
| O(5)-Lu-O(2)     | 103.01(15) |
| O(5)-Lu-O(1)     | 104.02(14) |
| O(2)-Lu-O(1)     | 97.77(16)  |
| O(5)-Lu-O(3)     | 100.66(15) |
| O(2)-Lu-O(3)     | 88.58(15)  |
| O(1)-Lu-O(3)     | 152.34(15) |
| O(5)-Lu-O(4)     | 100.14(15) |
| O(2)-Lu-O(4)     | 154.92(15) |
| O(1)-Lu-O(4)     | 85.76(15)  |
| O(3)-Lu-O(4)     | 77.73(15)  |
| O(5)-Lu-S        | 171.34(11) |
| O(2)-Lu-S        | 71.33(11)  |
| O(1)-Lu-S        | 70.92(11)  |
| O(3)-Lu-S        | 85.95(11)  |
| O(4)-Lu-S        | 86.66(11)  |
| C(2)-S-C(12)     | 103.8(3)   |
| C(2)-S-Lu        | 94.4(2)    |
| C(12)-S-Lu       | 94.09(19)  |
| C(1)-O(1)-Lu     | 133.7(4)   |
| C(13)-O(2)-Lu    | 132.8(4)   |
| C(45)-O(3)-C(42) | 106.1(6)   |
| C(45)-O(3)-Lu    | 122.1(4)   |
| C(42)-O(3)-Lu    | 128.6(5)   |

|                  |          |
|------------------|----------|
| C(49)-O(4)-C(46) | 108.3(5) |
| C(49)-O(4)-Lu    | 124.7(4) |
| C(46)-O(4)-Lu    | 126.3(4) |
| C(23)-O(5)-Lu    | 166.4(3) |
| O(1)-C(1)-C(2)   | 120.1(5) |
| O(1)-C(1)-C(6)   | 120.3(6) |
| C(2)-C(1)-C(6)   | 119.5(6) |
| C(1)-C(2)-C(3)   | 121.3(6) |
| C(1)-C(2)-S      | 120.0(4) |
| C(3)-C(2)-S      | 118.8(5) |
| C(4)-C(3)-C(2)   | 120.4(7) |
| C(4)-C(3)-H(3)   | 119.8    |
| C(2)-C(3)-H(3)   | 119.8    |
| C(3)-C(4)-C(5)   | 118.0(6) |
| C(3)-C(4)-C(7)   | 120.7(8) |
| C(5)-C(4)-C(7)   | 121.3(8) |
| C(4)-C(5)-C(6)   | 124.0(7) |
| C(4)-C(5)-H(5)   | 118.0    |
| C(6)-C(5)-H(5)   | 118.0    |
| C(5)-C(6)-C(1)   | 116.8(7) |
| C(5)-C(6)-C(8)   | 121.2(6) |
| C(1)-C(6)-C(8)   | 122.0(6) |
| C(4)-C(7)-H(7A)  | 109.5    |
| C(4)-C(7)-H(7B)  | 109.5    |
| H(7A)-C(7)-H(7B) | 109.5    |
| C(4)-C(7)-H(7C)  | 109.5    |
| H(7A)-C(7)-H(7C) | 109.5    |
| H(7B)-C(7)-H(7C) | 109.5    |
| C(6)-C(8)-C(11)  | 111.6(6) |
| C(6)-C(8)-C(9)   | 107.1(6) |
| C(11)-C(8)-C(9)  | 109.6(7) |
| C(6)-C(8)-C(10)  | 112.5(6) |
| C(11)-C(8)-C(10) | 108.6(7) |
| C(9)-C(8)-C(10)  | 107.3(6) |

|                     |          |
|---------------------|----------|
| C(8)-C(9)-H(9A)     | 109.5    |
| C(8)-C(9)-H(9B)     | 109.5    |
| H(9A)-C(9)-H(9B)    | 109.5    |
| C(8)-C(9)-H(9C)     | 109.5    |
| H(9A)-C(9)-H(9C)    | 109.5    |
| H(9B)-C(9)-H(9C)    | 109.5    |
| C(8)-C(10)-H(10A)   | 109.5    |
| C(8)-C(10)-H(10B)   | 109.5    |
| H(10A)-C(10)-H(10B) | 109.5    |
| C(8)-C(10)-H(10C)   | 109.5    |
| H(10A)-C(10)-H(10C) | 109.5    |
| H(10B)-C(10)-H(10C) | 109.5    |
| C(8)-C(11)-H(11A)   | 109.5    |
| C(8)-C(11)-H(11B)   | 109.5    |
| H(11A)-C(11)-H(11B) | 109.5    |
| C(8)-C(11)-H(11C)   | 109.5    |
| H(11A)-C(11)-H(11C) | 109.5    |
| H(11B)-C(11)-H(11C) | 109.5    |
| C(17)-C(12)-C(13)   | 122.2(6) |
| C(17)-C(12)-S       | 118.4(5) |
| C(13)-C(12)-S       | 119.4(4) |
| O(2)-C(13)-C(12)    | 121.0(5) |
| O(2)-C(13)-C(14)    | 120.8(5) |
| C(12)-C(13)-C(14)   | 118.2(5) |
| C(15)-C(14)-C(13)   | 117.4(6) |
| C(15)-C(14)-C(19)   | 122.5(6) |
| C(13)-C(14)-C(19)   | 120.0(5) |
| C(14)-C(15)-C(16)   | 124.9(6) |
| C(14)-C(15)-H(15)   | 117.5    |
| C(16)-C(15)-H(15)   | 117.5    |
| C(17)-C(16)-C(15)   | 116.6(6) |
| C(17)-C(16)-C(18)   | 122.0(6) |
| C(15)-C(16)-C(18)   | 121.4(6) |
| C(16)-C(17)-C(12)   | 120.5(6) |



|                     |          |
|---------------------|----------|
| C(16)-C(17)-H(17)   | 119.7    |
| C(12)-C(17)-H(17)   | 119.7    |
| C(16)-C(18)-H(18A)  | 109.5    |
| C(16)-C(18)-H(18B)  | 109.5    |
| H(18A)-C(18)-H(18B) | 109.5    |
| C(16)-C(18)-H(18C)  | 109.5    |
| H(18A)-C(18)-H(18C) | 109.5    |
| H(18B)-C(18)-H(18C) | 109.5    |
| C(21)-C(19)-C(14)   | 111.1(5) |
| C(21)-C(19)-C(22)   | 109.4(6) |
| C(14)-C(19)-C(22)   | 110.2(6) |
| C(21)-C(19)-C(20)   | 108.4(6) |
| C(14)-C(19)-C(20)   | 111.6(6) |
| C(22)-C(19)-C(20)   | 106.0(6) |
| C(19)-C(20)-H(20A)  | 109.5    |
| C(19)-C(20)-H(20B)  | 109.5    |
| H(20A)-C(20)-H(20B) | 109.5    |
| C(19)-C(20)-H(20C)  | 109.5    |
| H(20A)-C(20)-H(20C) | 109.5    |
| H(20B)-C(20)-H(20C) | 109.5    |
| C(19)-C(21)-H(21A)  | 109.5    |
| C(19)-C(21)-H(21B)  | 109.5    |
| H(21A)-C(21)-H(21B) | 109.5    |
| C(19)-C(21)-H(21C)  | 109.5    |
| H(21A)-C(21)-H(21C) | 109.5    |
| H(21B)-C(21)-H(21C) | 109.5    |
| C(19)-C(22)-H(22A)  | 109.5    |
| C(19)-C(22)-H(22B)  | 109.5    |
| H(22A)-C(22)-H(22B) | 109.5    |
| C(19)-C(22)-H(22C)  | 109.5    |
| H(22A)-C(22)-H(22C) | 109.5    |
| H(22B)-C(22)-H(22C) | 109.5    |
| O(5)-C(23)-C(24)    | 110.0(4) |
| O(5)-C(23)-C(36)    | 109.9(4) |

|                   |          |
|-------------------|----------|
| C(24)-C(23)-C(36) | 107.2(4) |
| O(5)-C(23)-C(30)  | 105.9(4) |
| C(24)-C(23)-C(30) | 111.5(4) |
| C(36)-C(23)-C(30) | 112.3(4) |
| C(25)-C(24)-C(29) | 117.2(5) |
| C(25)-C(24)-C(23) | 120.9(5) |
| C(29)-C(24)-C(23) | 121.9(5) |
| C(24)-C(25)-C(26) | 121.4(6) |
| C(24)-C(25)-H(25) | 119.3    |
| C(26)-C(25)-H(25) | 119.3    |
| C(27)-C(26)-C(25) | 121.0(6) |
| C(27)-C(26)-H(26) | 119.5    |
| C(25)-C(26)-H(26) | 119.5    |
| C(26)-C(27)-C(28) | 118.6(6) |
| C(26)-C(27)-H(27) | 120.7    |
| C(28)-C(27)-H(27) | 120.7    |
| C(27)-C(28)-C(29) | 120.4(6) |
| C(27)-C(28)-H(28) | 119.8    |
| C(29)-C(28)-H(28) | 119.8    |
| C(28)-C(29)-C(24) | 121.4(6) |
| C(28)-C(29)-H(29) | 119.3    |
| C(24)-C(29)-H(29) | 119.3    |
| C(35)-C(30)-C(31) | 117.6(5) |
| C(35)-C(30)-C(23) | 123.3(5) |
| C(31)-C(30)-C(23) | 118.7(5) |
| C(30)-C(31)-C(32) | 120.8(6) |
| C(30)-C(31)-H(31) | 119.6    |
| C(32)-C(31)-H(31) | 119.6    |
| C(33)-C(32)-C(31) | 120.6(6) |
| C(33)-C(32)-H(32) | 119.7    |
| C(31)-C(32)-H(32) | 119.7    |
| C(34)-C(33)-C(32) | 119.1(6) |
| C(34)-C(33)-H(33) | 120.4    |
| C(32)-C(33)-H(33) | 120.4    |

|                     |          |
|---------------------|----------|
| C(33)-C(34)-C(35)   | 121.0(6) |
| C(33)-C(34)-H(34)   | 119.5    |
| C(35)-C(34)-H(34)   | 119.5    |
| C(30)-C(35)-C(34)   | 120.8(6) |
| C(30)-C(35)-H(35)   | 119.6    |
| C(34)-C(35)-H(35)   | 119.6    |
| C(37)-C(36)-C(41)   | 117.8(5) |
| C(37)-C(36)-C(23)   | 120.4(5) |
| C(41)-C(36)-C(23)   | 121.7(5) |
| C(36)-C(37)-C(38)   | 121.1(6) |
| C(36)-C(37)-H(37)   | 119.5    |
| C(38)-C(37)-H(37)   | 119.5    |
| C(39)-C(38)-C(37)   | 120.0(6) |
| C(39)-C(38)-H(38)   | 120.0    |
| C(37)-C(38)-H(38)   | 120.0    |
| C(40)-C(39)-C(38)   | 119.1(6) |
| C(40)-C(39)-H(39)   | 120.4    |
| C(38)-C(39)-H(39)   | 120.4    |
| C(39)-C(40)-C(41)   | 121.3(7) |
| C(39)-C(40)-H(40)   | 119.4    |
| C(41)-C(40)-H(40)   | 119.4    |
| C(40)-C(41)-C(36)   | 120.6(6) |
| C(40)-C(41)-H(41)   | 119.7    |
| C(36)-C(41)-H(41)   | 119.7    |
| C(43)-C(42)-O(3)    | 109.4(8) |
| C(43)-C(42)-H(42A)  | 109.8    |
| O(3)-C(42)-H(42A)   | 109.8    |
| C(43)-C(42)-H(42B)  | 109.8    |
| O(3)-C(42)-H(42B)   | 109.8    |
| H(42A)-C(42)-H(42B) | 108.2    |
| C(42)-C(43)-C(44)   | 105.5(7) |
| C(42)-C(43)-H(43A)  | 110.6    |
| C(44)-C(43)-H(43A)  | 110.6    |
| C(42)-C(43)-H(43B)  | 110.6    |

|                     |          |
|---------------------|----------|
| C(44)-C(43)-H(43B)  | 110.6    |
| H(43A)-C(43)-H(43B) | 108.8    |
| C(45)-C(44)-C(43)   | 104.6(8) |
| C(45)-C(44)-H(44A)  | 110.8    |
| C(43)-C(44)-H(44A)  | 110.8    |
| C(45)-C(44)-H(44B)  | 110.8    |
| C(43)-C(44)-H(44B)  | 110.8    |
| H(44A)-C(44)-H(44B) | 108.9    |
| O(3)-C(45)-C(44)    | 108.6(8) |
| O(3)-C(45)-H(45A)   | 110.0    |
| C(44)-C(45)-H(45A)  | 110.0    |
| O(3)-C(45)-H(45B)   | 110.0    |
| C(44)-C(45)-H(45B)  | 110.0    |
| H(45A)-C(45)-H(45B) | 108.3    |
| O(4)-C(46)-C(47)    | 106.3(7) |
| O(4)-C(46)-H(46A)   | 110.5    |
| C(47)-C(46)-H(46A)  | 110.5    |
| O(4)-C(46)-H(46B)   | 110.5    |
| C(47)-C(46)-H(46B)  | 110.5    |
| H(46A)-C(46)-H(46B) | 108.7    |
| C(48)-C(47)-C(46)   | 107.2(8) |
| C(48)-C(47)-H(47A)  | 110.3    |
| C(46)-C(47)-H(47A)  | 110.3    |
| C(48)-C(47)-H(47B)  | 110.3    |
| C(46)-C(47)-H(47B)  | 110.3    |
| H(47A)-C(47)-H(47B) | 108.5    |
| C(47)-C(48)-C(49)   | 108.8(9) |
| C(47)-C(48)-H(48A)  | 109.9    |
| C(49)-C(48)-H(48A)  | 109.9    |
| C(47)-C(48)-H(48B)  | 109.9    |
| C(49)-C(48)-H(48B)  | 109.9    |
| H(48A)-C(48)-H(48B) | 108.3    |
| O(4)-C(49)-C(48)    | 107.5(7) |
| O(4)-C(49)-H(49A)   | 110.2    |

|                     |           |
|---------------------|-----------|
| C(48)-C(49)-H(49A)  | 110.2     |
| O(4)-C(49)-H(49B)   | 110.2     |
| C(48)-C(49)-H(49B)  | 110.2     |
| H(49A)-C(49)-H(49B) | 108.5     |
| C(54)-C(50)-C(51)   | 79(2)     |
| C(54)-C(50)-H(50A)  | 115.3     |
| C(51)-C(50)-H(50A)  | 115.4     |
| C(54)-C(50)-H(50B)  | 115.3     |
| C(51)-C(50)-H(50B)  | 115.4     |
| H(50A)-C(50)-H(50B) | 112.4     |
| C(50)-C(51)-C(52)   | 104.9(16) |
| C(50)-C(51)-C(54)   | 50.0(12)  |
| C(52)-C(51)-C(54)   | 84.8(12)  |
| C(50)-C(51)-H(51A)  | 110.7     |
| C(52)-C(51)-H(51A)  | 110.8     |
| C(54)-C(51)-H(51A)  | 159.2     |
| C(50)-C(51)-H(51B)  | 110.8     |
| C(52)-C(51)-H(51B)  | 110.8     |
| C(54)-C(51)-H(51B)  | 76.5      |
| H(51A)-C(51)-H(51B) | 108.8     |
| C(51)-C(52)-C(53)   | 94.3(12)  |
| C(51)-C(52)-H(52A)  | 112.9     |
| C(53)-C(52)-H(52A)  | 112.9     |
| C(51)-C(52)-H(52B)  | 112.8     |
| C(53)-C(52)-H(52B)  | 112.9     |
| H(52A)-C(52)-H(52B) | 110.3     |
| C(54)-C(53)-C(52)   | 97.4(13)  |
| C(54)-C(53)-H(53A)  | 112.3     |
| C(52)-C(53)-H(53A)  | 112.3     |
| C(54)-C(53)-H(53B)  | 112.2     |
| C(52)-C(53)-H(53B)  | 112.2     |
| H(53A)-C(53)-H(53B) | 109.9     |
| C(50)-C(54)-C(53)   | 101(3)    |
| C(50)-C(54)-C(51)   | 50.6(12)  |

|                      |           |
|----------------------|-----------|
| C(53)-C(54)-C(51)    | 83.2(12)  |
| C(50)-C(54)-H(54A)   | 111.6     |
| C(53)-C(54)-H(54A)   | 111.6     |
| C(51)-C(54)-H(54A)   | 75.0      |
| C(50)-C(54)-H(54B)   | 111.7     |
| C(53)-C(54)-H(54B)   | 111.6     |
| C(51)-C(54)-H(54B)   | 160.1     |
| H(54A)-C(54)-H(54B)  | 109.4     |
| C(56)#1-C(55)-C(56)  | 107.7(16) |
| C(56)#1-C(55)-H(55A) | 110.2     |
| C(56)-C(55)-H(55A)   | 110.2     |
| C(56)#1-C(55)-H(55B) | 110.2     |
| C(56)-C(55)-H(55B)   | 110.2     |
| H(55A)-C(55)-H(55B)  | 108.5     |
| C(55)-C(56)-C(57)    | 105.6(14) |
| C(55)-C(56)-H(56A)   | 110.6     |
| C(57)-C(56)-H(56A)   | 110.6     |
| C(55)-C(56)-H(56B)   | 110.6     |
| C(57)-C(56)-H(56B)   | 110.6     |
| H(56A)-C(56)-H(56B)  | 108.7     |
| C(57)#1-C(57)-C(56)  | 104(2)    |
| C(57)#1-C(57)-H(57A) | 110.9     |
| C(56)-C(57)-H(57A)   | 110.9     |
| C(57)#1-C(57)-H(57B) | 110.9     |
| C(56)-C(57)-H(57B)   | 110.9     |
| H(57A)-C(57)-H(57B)  | 108.9     |
| C(59)-C(58)-H(58A)   | 109.5     |
| C(59)-C(58)-H(58B)   | 109.5     |
| H(58A)-C(58)-H(58B)  | 109.5     |
| C(59)-C(58)-H(58C)   | 109.5     |
| H(58A)-C(58)-H(58C)  | 109.5     |
| H(58B)-C(58)-H(58C)  | 109.5     |
| C(60)-C(59)-C(58)    | 110.8(18) |
| C(60)-C(59)-H(59A)   | 109.5     |

|                      |           |
|----------------------|-----------|
| C(58)-C(59)-H(59A)   | 109.5     |
| C(60)-C(59)-H(59B)   | 109.5     |
| C(58)-C(59)-H(59B)   | 109.5     |
| H(59A)-C(59)-H(59B)  | 108.1     |
| C(59)-C(60)-C(61)    | 111.7(15) |
| C(59)-C(60)-H(60A)   | 109.2     |
| C(61)-C(60)-H(60A)   | 109.3     |
| C(59)-C(60)-H(60B)   | 109.3     |
| C(61)-C(60)-H(60B)   | 109.3     |
| H(60A)-C(60)-H(60B)  | 107.9     |
| C(60)-C(61)-C(62)    | 99.9(12)  |
| C(60)-C(61)-H(61A)   | 111.7     |
| C(62)-C(61)-H(61A)   | 111.8     |
| C(60)-C(61)-H(61B)   | 111.8     |
| C(62)-C(61)-H(61B)   | 111.9     |
| H(61A)-C(61)-H(61B)  | 109.5     |
| C(61)-C(62)-H(62A)   | 109.5     |
| C(61)-C(62)-H(62B)   | 109.4     |
| H(62A)-C(62)-H(62B)  | 109.5     |
| C(61)-C(62)-H(62C)   | 109.5     |
| H(62A)-C(62)-H(62C)  | 109.5     |
| H(62B)-C(62)-H(62C)  | 109.5     |
| C(64)-C(63)-C(64)#1  | 123(2)    |
| C(64)-C(63)-H(63A)   | 106.5     |
| C(64)#1-C(63)-H(63A) | 106.5     |
| C(64)-C(63)-H(63B)   | 106.5     |
| C(64)#1-C(63)-H(63B) | 106.5     |
| H(63A)-C(63)-H(63B)  | 106.5     |
| C(63)-C(64)-C(65)    | 113.2(16) |
| C(63)-C(64)-H(64A)   | 108.9     |
| C(65)-C(64)-H(64A)   | 108.9     |
| C(63)-C(64)-H(64B)   | 108.9     |
| C(65)-C(64)-H(64B)   | 108.9     |
| H(64A)-C(64)-H(64B)  | 107.8     |

|                     |       |
|---------------------|-------|
| C(64)-C(65)-H(65A)  | 109.5 |
| C(64)-C(65)-H(65B)  | 109.5 |
| H(65A)-C(65)-H(65B) | 109.5 |
| C(64)-C(65)-H(65C)  | 109.5 |
| H(65A)-C(65)-H(65C) | 109.5 |
| H(65B)-C(65)-H(65C) | 109.5 |

Symmetry transformations used to generate equivalent atoms: #1 -x,y,-z+1/2

**Table 5.1 Crystal data and structure refinement for [Lu(tbmp)(OCHPh<sub>2</sub>)(THF)<sub>3</sub>] (6).**

|                                 |                                                    |                 |
|---------------------------------|----------------------------------------------------|-----------------|
| Identification code             | mk6                                                |                 |
| Empirical formula               | C <sub>47</sub> H <sub>63</sub> LuO <sub>6</sub> S |                 |
| Formula weight                  | 931.00                                             |                 |
| Temperature                     | 130(2) K                                           |                 |
| Wavelength                      | 0.71073 Å                                          |                 |
| Crystal system                  | Monoclinic                                         |                 |
| Space group                     | P2 <sub>1</sub> /n                                 |                 |
| Unit cell dimensions            | a = 14.710(3) Å                                    | α = 90°         |
|                                 | b = 13.582(3) Å                                    | β = 108.290(4)° |
|                                 | c = 22.910(4) Å                                    | γ = 90°         |
| Volume                          | 4346.0(14) Å <sup>3</sup>                          |                 |
| Z                               | 4                                                  |                 |
| Density (calculated)            | 1.423 Mg/m <sup>3</sup>                            |                 |
| Absorption coefficient          | 2.366 mm <sup>-1</sup>                             |                 |
| F(000)                          | 1920                                               |                 |
| Crystal size                    | 0.28×0.21×0.08 mm <sup>3</sup>                     |                 |
| Theta range for data collection | 1.96 to 28.38°                                     |                 |
| Index ranges                    | -19≤h≤19, -18≤k≤18, -30≤l≤30                       |                 |
| Reflections collected           | 57519                                              |                 |
| Independent reflections         | 10862 [R(int) = 0.0947]                            |                 |
| Completeness to theta = 28.38°  | 99.7 %                                             |                 |
| Absorption correction           | Empirical                                          |                 |
| Max. and min. transmission      | 0.8333 and 0.5571                                  |                 |



|                                      |                                    |
|--------------------------------------|------------------------------------|
| Refinement method                    | Full-matrix least-squares on $F^2$ |
| Data / restraints / parameters       | 10862 / 0 / 496                    |
| Goodness-of-fit on $F^2$             | 1.015                              |
| Final R indices [ $I > 2\sigma(I)$ ] | R1 = 0.0420, wR2 = 0.0884          |
| R indices (all data)                 | R1 = 0.0700, wR2 = 0.0973          |
| Largest diff. peak and hole          | 1.488 and -0.812 e.Å <sup>-3</sup> |

**Table 5.2 Bond lengths [Å] and angles [°] for mk6.**

---

|            |            |
|------------|------------|
| Lu(1)-O(3) | 2.045(3)   |
| Lu(1)-O(1) | 2.151(3)   |
| Lu(1)-O(2) | 2.176(3)   |
| Lu(1)-O(6) | 2.347(3)   |
| Lu(1)-O(4) | 2.389(3)   |
| Lu(1)-O(5) | 2.445(3)   |
| Lu(1)-S(1) | 2.8707(11) |
| S(1)-C(22) | 1.765(4)   |
| S(1)-C(11) | 1.788(4)   |
| O(1)-C(1)  | 1.326(4)   |
| O(2)-C(12) | 1.316(5)   |
| O(3)-C(23) | 1.383(5)   |
| O(4)-C(36) | 1.431(5)   |
| O(4)-C(39) | 1.442(5)   |
| O(5)-C(40) | 1.438(5)   |
| O(5)-C(43) | 1.450(5)   |
| O(6)-C(47) | 1.440(5)   |
| O(6)-C(44) | 1.444(6)   |
| C(1)-C(11) | 1.417(5)   |
| C(1)-C(2)  | 1.427(6)   |
| C(2)-C(7)  | 1.395(6)   |
| C(2)-C(3)  | 1.522(6)   |
| C(3)-C(4)  | 1.526(6)   |
| C(3)-C(5)  | 1.528(6)   |
| C(3)-C(6)  | 1.535(6)   |

|              |          |
|--------------|----------|
| C(4)-H(4A)   | 0.9800   |
| C(4)-H(4B)   | 0.9800   |
| C(4)-H(4C)   | 0.9800   |
| C(5)-H(5A)   | 0.9800   |
| C(5)-H(5B)   | 0.9800   |
| C(5)-H(5C)   | 0.9800   |
| C(6)-H(6A)   | 0.9800   |
| C(6)-H(6B)   | 0.9800   |
| C(6)-H(6C)   | 0.9800   |
| C(7)-C(8)    | 1.406(6) |
| C(7)-H(7)    | 0.9500   |
| C(8)-C(10)   | 1.363(6) |
| C(8)-C(9)    | 1.512(6) |
| C(9)-H(9A)   | 0.9800   |
| C(9)-H(9B)   | 0.9800   |
| C(9)-H(9C)   | 0.9800   |
| C(10)-C(11)  | 1.383(5) |
| C(10)-H(10)  | 0.9500   |
| C(12)-C(22)  | 1.406(6) |
| C(12)-C(13)  | 1.428(6) |
| C(13)-C(18)  | 1.394(6) |
| C(13)-C(14)  | 1.520(6) |
| C(14)-C(15)  | 1.513(7) |
| C(14)-C(17)  | 1.519(6) |
| C(14)-C(16)  | 1.534(7) |
| C(15)-H(15A) | 0.9800   |
| C(15)-H(15B) | 0.9800   |
| C(15)-H(15C) | 0.9800   |
| C(16)-H(16A) | 0.9800   |
| C(16)-H(16B) | 0.9800   |
| C(16)-H(16C) | 0.9800   |
| C(17)-H(17A) | 0.9800   |
| C(17)-H(17B) | 0.9800   |
| C(17)-H(17C) | 0.9800   |

|              |          |
|--------------|----------|
| C(18)-C(19)  | 1.402(6) |
| C(18)-H(18)  | 0.9500   |
| C(19)-C(21)  | 1.367(6) |
| C(19)-C(20)  | 1.511(6) |
| C(20)-H(20A) | 0.9800   |
| C(20)-H(20B) | 0.9800   |
| C(20)-H(20C) | 0.9800   |
| C(21)-C(22)  | 1.388(6) |
| C(21)-H(21)  | 0.9500   |
| C(23)-C(24)  | 1.523(6) |
| C(23)-C(30)  | 1.528(6) |
| C(23)-H(23)  | 1.0000   |
| C(24)-C(29)  | 1.372(6) |
| C(24)-C(25)  | 1.389(6) |
| C(25)-C(26)  | 1.378(7) |
| C(25)-H(25)  | 0.9500   |
| C(26)-C(27)  | 1.370(7) |
| C(26)-H(26)  | 0.9500   |
| C(27)-C(28)  | 1.362(7) |
| C(27)-H(27)  | 0.9500   |
| C(28)-C(29)  | 1.393(6) |
| C(28)-H(28)  | 0.9500   |
| C(29)-H(29)  | 0.9500   |
| C(30)-C(31)  | 1.373(6) |
| C(30)-C(35)  | 1.391(6) |
| C(31)-C(32)  | 1.386(7) |
| C(31)-H(31)  | 0.9500   |
| C(32)-C(33)  | 1.378(7) |
| C(32)-H(32)  | 0.9500   |
| C(33)-C(34)  | 1.372(7) |
| C(33)-H(33)  | 0.9500   |
| C(34)-C(35)  | 1.385(6) |
| C(34)-H(34)  | 0.9500   |
| C(35)-H(35)  | 0.9500   |

|              |          |
|--------------|----------|
| C(36)-C(37)  | 1.504(7) |
| C(36)-H(36A) | 0.9900   |
| C(36)-H(36B) | 0.9900   |
| C(37)-C(38)  | 1.500(7) |
| C(37)-H(37A) | 0.9900   |
| C(37)-H(37B) | 0.9900   |
| C(38)-C(39)  | 1.505(7) |
| C(38)-H(38A) | 0.9900   |
| C(38)-H(38B) | 0.9900   |
| C(39)-H(39A) | 0.9900   |
| C(39)-H(39B) | 0.9900   |
| C(40)-C(41)  | 1.482(7) |
| C(40)-H(40A) | 0.9900   |
| C(40)-H(40B) | 0.9900   |
| C(41)-C(42)  | 1.519(6) |
| C(41)-H(41A) | 0.9900   |
| C(41)-H(41B) | 0.9900   |
| C(42)-C(43)  | 1.525(6) |
| C(42)-H(42A) | 0.9900   |
| C(42)-H(42B) | 0.9900   |
| C(43)-H(43A) | 0.9900   |
| C(43)-H(43B) | 0.9900   |
| C(44)-C(45)  | 1.499(7) |
| C(44)-H(44A) | 0.9900   |
| C(44)-H(44B) | 0.9900   |
| C(45)-C(46)  | 1.475(8) |
| C(45)-H(45A) | 0.9900   |
| C(45)-H(45B) | 0.9900   |
| C(46)-C(47)  | 1.504(8) |
| C(46)-H(46A) | 0.9900   |
| C(46)-H(46B) | 0.9900   |
| C(47)-H(47A) | 0.9900   |
| C(47)-H(47B) | 0.9900   |

|                  |            |
|------------------|------------|
| O(3)-Lu(1)-O(1)  | 162.89(12) |
| O(3)-Lu(1)-O(2)  | 96.59(11)  |
| O(1)-Lu(1)-O(2)  | 95.81(11)  |
| O(3)-Lu(1)-O(6)  | 100.07(11) |
| O(1)-Lu(1)-O(6)  | 94.00(11)  |
| O(2)-Lu(1)-O(6)  | 78.08(10)  |
| O(3)-Lu(1)-O(4)  | 87.67(11)  |
| O(1)-Lu(1)-O(4)  | 87.33(11)  |
| O(2)-Lu(1)-O(4)  | 150.56(11) |
| O(6)-Lu(1)-O(4)  | 72.50(11)  |
| O(3)-Lu(1)-O(5)  | 80.85(11)  |
| O(1)-Lu(1)-O(5)  | 82.04(10)  |
| O(2)-Lu(1)-O(5)  | 137.47(10) |
| O(6)-Lu(1)-O(5)  | 144.39(10) |
| O(4)-Lu(1)-O(5)  | 71.97(10)  |
| O(3)-Lu(1)-S(1)  | 102.42(9)  |
| O(1)-Lu(1)-S(1)  | 71.33(7)   |
| O(2)-Lu(1)-S(1)  | 68.77(7)   |
| O(6)-Lu(1)-S(1)  | 141.59(8)  |
| O(4)-Lu(1)-S(1)  | 138.74(8)  |
| O(5)-Lu(1)-S(1)  | 70.41(7)   |
| C(22)-S(1)-C(11) | 105.01(19) |
| C(22)-S(1)-Lu(1) | 97.73(14)  |
| C(11)-S(1)-Lu(1) | 95.41(13)  |
| C(1)-O(1)-Lu(1)  | 132.2(2)   |
| C(12)-O(2)-Lu(1) | 132.3(3)   |
| C(23)-O(3)-Lu(1) | 170.2(3)   |
| C(36)-O(4)-C(39) | 109.9(4)   |
| C(36)-O(4)-Lu(1) | 123.5(3)   |
| C(39)-O(4)-Lu(1) | 126.6(3)   |
| C(40)-O(5)-C(43) | 107.9(3)   |
| C(40)-O(5)-Lu(1) | 126.5(3)   |
| C(43)-O(5)-Lu(1) | 123.2(2)   |
| C(47)-O(6)-C(44) | 108.6(4)   |

|                  |          |
|------------------|----------|
| C(47)-O(6)-Lu(1) | 123.0(3) |
| C(44)-O(6)-Lu(1) | 127.5(3) |
| O(1)-C(1)-C(11)  | 120.6(4) |
| O(1)-C(1)-C(2)   | 122.4(4) |
| C(11)-C(1)-C(2)  | 116.9(4) |
| C(7)-C(2)-C(1)   | 118.1(4) |
| C(7)-C(2)-C(3)   | 121.0(4) |
| C(1)-C(2)-C(3)   | 120.8(4) |
| C(2)-C(3)-C(4)   | 113.2(4) |
| C(2)-C(3)-C(5)   | 110.1(4) |
| C(4)-C(3)-C(5)   | 107.9(4) |
| C(2)-C(3)-C(6)   | 108.7(3) |
| C(4)-C(3)-C(6)   | 106.7(4) |
| C(5)-C(3)-C(6)   | 110.2(4) |
| C(3)-C(4)-H(4A)  | 109.5    |
| C(3)-C(4)-H(4B)  | 109.5    |
| H(4A)-C(4)-H(4B) | 109.5    |
| C(3)-C(4)-H(4C)  | 109.5    |
| H(4A)-C(4)-H(4C) | 109.5    |
| H(4B)-C(4)-H(4C) | 109.5    |
| C(3)-C(5)-H(5A)  | 109.5    |
| C(3)-C(5)-H(5B)  | 109.5    |
| H(5A)-C(5)-H(5B) | 109.5    |
| C(3)-C(5)-H(5C)  | 109.5    |
| H(5A)-C(5)-H(5C) | 109.5    |
| H(5B)-C(5)-H(5C) | 109.5    |
| C(3)-C(6)-H(6A)  | 109.5    |
| C(3)-C(6)-H(6B)  | 109.5    |
| H(6A)-C(6)-H(6B) | 109.5    |
| C(3)-C(6)-H(6C)  | 109.5    |
| H(6A)-C(6)-H(6C) | 109.5    |
| H(6B)-C(6)-H(6C) | 109.5    |
| C(2)-C(7)-C(8)   | 123.7(4) |
| C(2)-C(7)-H(7)   | 118.1    |

|                     |          |
|---------------------|----------|
| C(8)-C(7)-H(7)      | 118.1    |
| C(10)-C(8)-C(7)     | 117.6(4) |
| C(10)-C(8)-C(9)     | 121.0(4) |
| C(7)-C(8)-C(9)      | 121.4(4) |
| C(8)-C(9)-H(9A)     | 109.5    |
| C(8)-C(9)-H(9B)     | 109.5    |
| H(9A)-C(9)-H(9B)    | 109.5    |
| C(8)-C(9)-H(9C)     | 109.5    |
| H(9A)-C(9)-H(9C)    | 109.5    |
| H(9B)-C(9)-H(9C)    | 109.5    |
| C(8)-C(10)-C(11)    | 121.0(4) |
| C(8)-C(10)-H(10)    | 119.5    |
| C(11)-C(10)-H(10)   | 119.5    |
| C(10)-C(11)-C(1)    | 122.6(4) |
| C(10)-C(11)-S(1)    | 118.5(3) |
| C(1)-C(11)-S(1)     | 118.8(3) |
| O(2)-C(12)-C(22)    | 120.5(4) |
| O(2)-C(12)-C(13)    | 122.2(4) |
| C(22)-C(12)-C(13)   | 117.3(4) |
| C(18)-C(13)-C(12)   | 117.3(4) |
| C(18)-C(13)-C(14)   | 122.2(4) |
| C(12)-C(13)-C(14)   | 120.5(4) |
| C(15)-C(14)-C(17)   | 106.8(4) |
| C(15)-C(14)-C(13)   | 112.3(4) |
| C(17)-C(14)-C(13)   | 110.8(4) |
| C(15)-C(14)-C(16)   | 108.6(5) |
| C(17)-C(14)-C(16)   | 108.9(4) |
| C(13)-C(14)-C(16)   | 109.4(4) |
| C(14)-C(15)-H(15A)  | 109.5    |
| C(14)-C(15)-H(15B)  | 109.5    |
| H(15A)-C(15)-H(15B) | 109.5    |
| C(14)-C(15)-H(15C)  | 109.5    |
| H(15A)-C(15)-H(15C) | 109.5    |
| H(15B)-C(15)-H(15C) | 109.5    |

|                     |          |
|---------------------|----------|
| C(14)-C(16)-H(16A)  | 109.5    |
| C(14)-C(16)-H(16B)  | 109.5    |
| H(16A)-C(16)-H(16B) | 109.5    |
| C(14)-C(16)-H(16C)  | 109.5    |
| H(16A)-C(16)-H(16C) | 109.5    |
| H(16B)-C(16)-H(16C) | 109.5    |
| C(14)-C(17)-H(17A)  | 109.5    |
| C(14)-C(17)-H(17B)  | 109.5    |
| H(17A)-C(17)-H(17B) | 109.5    |
| C(14)-C(17)-H(17C)  | 109.5    |
| H(17A)-C(17)-H(17C) | 109.5    |
| H(17B)-C(17)-H(17C) | 109.5    |
| C(13)-C(18)-C(19)   | 124.5(4) |
| C(13)-C(18)-H(18)   | 117.7    |
| C(19)-C(18)-H(18)   | 117.7    |
| C(21)-C(19)-C(18)   | 117.3(4) |
| C(21)-C(19)-C(20)   | 122.5(4) |
| C(18)-C(19)-C(20)   | 120.2(4) |
| C(19)-C(20)-H(20A)  | 109.5    |
| C(19)-C(20)-H(20B)  | 109.5    |
| H(20A)-C(20)-H(20B) | 109.5    |
| C(19)-C(20)-H(20C)  | 109.5    |
| H(20A)-C(20)-H(20C) | 109.5    |
| H(20B)-C(20)-H(20C) | 109.5    |
| C(19)-C(21)-C(22)   | 120.4(4) |
| C(19)-C(21)-H(21)   | 119.8    |
| C(22)-C(21)-H(21)   | 119.8    |
| C(21)-C(22)-C(12)   | 123.0(4) |
| C(21)-C(22)-S(1)    | 119.9(3) |
| C(12)-C(22)-S(1)    | 116.8(3) |
| O(3)-C(23)-C(24)    | 111.2(4) |
| O(3)-C(23)-C(30)    | 112.1(3) |
| C(24)-C(23)-C(30)   | 112.2(3) |
| O(3)-C(23)-H(23)    | 107.0    |



|                   |          |
|-------------------|----------|
| C(24)-C(23)-H(23) | 107.0    |
| C(30)-C(23)-H(23) | 107.0    |
| C(29)-C(24)-C(25) | 119.0(4) |
| C(29)-C(24)-C(23) | 121.0(4) |
| C(25)-C(24)-C(23) | 120.0(4) |
| C(26)-C(25)-C(24) | 120.2(4) |
| C(26)-C(25)-H(25) | 119.9    |
| C(24)-C(25)-H(25) | 119.9    |
| C(27)-C(26)-C(25) | 120.2(5) |
| C(27)-C(26)-H(26) | 119.9    |
| C(25)-C(26)-H(26) | 119.9    |
| C(28)-C(27)-C(26) | 120.3(5) |
| C(28)-C(27)-H(27) | 119.9    |
| C(26)-C(27)-H(27) | 119.9    |
| C(27)-C(28)-C(29) | 119.9(4) |
| C(27)-C(28)-H(28) | 120.0    |
| C(29)-C(28)-H(28) | 120.0    |
| C(24)-C(29)-C(28) | 120.3(5) |
| C(24)-C(29)-H(29) | 119.8    |
| C(28)-C(29)-H(29) | 119.8    |
| C(31)-C(30)-C(35) | 117.8(4) |
| C(31)-C(30)-C(23) | 121.2(4) |
| C(35)-C(30)-C(23) | 121.0(4) |
| C(30)-C(31)-C(32) | 121.5(4) |
| C(30)-C(31)-H(31) | 119.2    |
| C(32)-C(31)-H(31) | 119.2    |
| C(33)-C(32)-C(31) | 119.8(5) |
| C(33)-C(32)-H(32) | 120.1    |
| C(31)-C(32)-H(32) | 120.1    |
| C(34)-C(33)-C(32) | 119.8(5) |
| C(34)-C(33)-H(33) | 120.1    |
| C(32)-C(33)-H(33) | 120.1    |
| C(33)-C(34)-C(35) | 119.9(4) |
| C(33)-C(34)-H(34) | 120.1    |

|                     |          |
|---------------------|----------|
| C(35)-C(34)-H(34)   | 120.1    |
| C(34)-C(35)-C(30)   | 121.2(4) |
| C(34)-C(35)-H(35)   | 119.4    |
| C(30)-C(35)-H(35)   | 119.4    |
| O(4)-C(36)-C(37)    | 105.6(4) |
| O(4)-C(36)-H(36A)   | 110.6    |
| C(37)-C(36)-H(36A)  | 110.6    |
| O(4)-C(36)-H(36B)   | 110.6    |
| C(37)-C(36)-H(36B)  | 110.6    |
| H(36A)-C(36)-H(36B) | 108.7    |
| C(38)-C(37)-C(36)   | 102.3(4) |
| C(38)-C(37)-H(37A)  | 111.3    |
| C(36)-C(37)-H(37A)  | 111.3    |
| C(38)-C(37)-H(37B)  | 111.3    |
| C(36)-C(37)-H(37B)  | 111.3    |
| H(37A)-C(37)-H(37B) | 109.2    |
| C(37)-C(38)-C(39)   | 103.1(4) |
| C(37)-C(38)-H(38A)  | 111.2    |
| C(39)-C(38)-H(38A)  | 111.2    |
| C(37)-C(38)-H(38B)  | 111.2    |
| C(39)-C(38)-H(38B)  | 111.2    |
| H(38A)-C(38)-H(38B) | 109.1    |
| O(4)-C(39)-C(38)    | 105.2(4) |
| O(4)-C(39)-H(39A)   | 110.7    |
| C(38)-C(39)-H(39A)  | 110.7    |
| O(4)-C(39)-H(39B)   | 110.7    |
| C(38)-C(39)-H(39B)  | 110.7    |
| H(39A)-C(39)-H(39B) | 108.8    |
| O(5)-C(40)-C(41)    | 105.5(4) |
| O(5)-C(40)-H(40A)   | 110.6    |
| C(41)-C(40)-H(40A)  | 110.6    |
| O(5)-C(40)-H(40B)   | 110.6    |
| C(41)-C(40)-H(40B)  | 110.6    |
| H(40A)-C(40)-H(40B) | 108.8    |

|                     |          |
|---------------------|----------|
| C(40)-C(41)-C(42)   | 103.9(4) |
| C(40)-C(41)-H(41A)  | 111.0    |
| C(42)-C(41)-H(41A)  | 111.0    |
| C(40)-C(41)-H(41B)  | 111.0    |
| C(42)-C(41)-H(41B)  | 111.0    |
| H(41A)-C(41)-H(41B) | 109.0    |
| C(41)-C(42)-C(43)   | 104.7(4) |
| C(41)-C(42)-H(42A)  | 110.8    |
| C(43)-C(42)-H(42A)  | 110.8    |
| C(41)-C(42)-H(42B)  | 110.8    |
| C(43)-C(42)-H(42B)  | 110.8    |
| H(42A)-C(42)-H(42B) | 108.9    |
| O(5)-C(43)-C(42)    | 106.4(3) |
| O(5)-C(43)-H(43A)   | 110.4    |
| C(42)-C(43)-H(43A)  | 110.4    |
| O(5)-C(43)-H(43B)   | 110.4    |
| C(42)-C(43)-H(43B)  | 110.4    |
| H(43A)-C(43)-H(43B) | 108.6    |
| O(6)-C(44)-C(45)    | 106.5(4) |
| O(6)-C(44)-H(44A)   | 110.4    |
| C(45)-C(44)-H(44A)  | 110.4    |
| O(6)-C(44)-H(44B)   | 110.4    |
| C(45)-C(44)-H(44B)  | 110.4    |
| H(44A)-C(44)-H(44B) | 108.6    |
| C(46)-C(45)-C(44)   | 105.2(5) |
| C(46)-C(45)-H(45A)  | 110.7    |
| C(44)-C(45)-H(45A)  | 110.7    |
| C(46)-C(45)-H(45B)  | 110.7    |
| C(44)-C(45)-H(45B)  | 110.7    |
| H(45A)-C(45)-H(45B) | 108.8    |
| C(45)-C(46)-C(47)   | 103.4(5) |
| C(45)-C(46)-H(46A)  | 111.1    |
| C(47)-C(46)-H(46A)  | 111.1    |
| C(45)-C(46)-H(46B)  | 111.1    |

|                     |          |
|---------------------|----------|
| C(47)-C(46)-H(46B)  | 111.1    |
| H(46A)-C(46)-H(46B) | 109.0    |
| O(6)-C(47)-C(46)    | 104.2(5) |
| O(6)-C(47)-H(47A)   | 110.9    |
| C(46)-C(47)-H(47A)  | 110.9    |
| O(6)-C(47)-H(47B)   | 110.9    |
| C(46)-C(47)-H(47B)  | 110.9    |
| H(47A)-C(47)-H(47B) | 108.9    |

**Table 6.1 Crystal data and structure refinement for [Lu(tbmp)( $\mu$ -H)(THF)<sub>2</sub>]<sub>2</sub> (7).**

|                                 |                                                    |                            |
|---------------------------------|----------------------------------------------------|----------------------------|
| Identification code             | mk7                                                |                            |
| Empirical formula               | C <sub>39</sub> H <sub>65</sub> LuO <sub>5</sub> S |                            |
| Formula weight                  | 820.98                                             |                            |
| Temperature                     | 140(2) K                                           |                            |
| Wavelength                      | 0.71073 Å                                          |                            |
| Crystal system                  | Monoclinic                                         |                            |
| Space group                     | C 2/c                                              |                            |
| Unit cell dimensions            | a = 29.835(9) Å                                    | $\alpha = 90^\circ$        |
|                                 | b = 17.805(6) Å                                    | $\beta = 121.466(5)^\circ$ |
|                                 | c = 18.098(6) Å                                    | $\gamma = 90^\circ$        |
| Volume                          | 8200(5) Å <sup>3</sup>                             |                            |
| Z                               | 8                                                  |                            |
| Density (calculated)            | 1.330 Mg/m <sup>3</sup>                            |                            |
| Absorption coefficient          | 2.496 mm <sup>-1</sup>                             |                            |
| F(000)                          | 3407                                               |                            |
| Crystal size                    | 0.60×0.30×0.30 mm <sup>3</sup>                     |                            |
| Theta range for data collection | 2.26 to 28.36°                                     |                            |
| Index ranges                    | -39≤h≤39, -23≤k≤23, -24≤l≤23                       |                            |
| Reflections collected           | 42018                                              |                            |
| Independent reflections         | 10147 [R(int) = 0.0280]                            |                            |
| Completeness to theta = 28.36°  | 99.0 %                                             |                            |
| Absorption correction           | Empirical                                          |                            |
| Max. and min. transmission      | 0.5214 and 0.3159                                  |                            |

|                                      |                                    |
|--------------------------------------|------------------------------------|
| Refinement method                    | Full-matrix least-squares on $F^2$ |
| Data / restraints / parameters       | 10147 / 14 / 414                   |
| Goodness-of-fit on $F^2$             | 0.987                              |
| Final R indices [ $I > 2\sigma(I)$ ] | R1 = 0.0256, wR2 = 0.0633          |
| R indices (all data)                 | R1 = 0.0332, wR2 = 0.0682          |
| Largest diff. peak and hole          | 1.783 and -0.513 e.Å <sup>-3</sup> |

**Table 6.2 Bond lengths [Å] and angles [°] for mk7.**

---

|            |            |
|------------|------------|
| Lu-O(1)    | 2.1229(18) |
| Lu-O(2)    | 2.1245(19) |
| Lu-O(4)    | 2.3456(19) |
| Lu-O(3)    | 2.379(2)   |
| Lu-S       | 2.9191(12) |
| Lu-Lu#1    | 3.5530(13) |
| Lu-H(1)    | 2.09(3)    |
| S-C(12)    | 1.779(3)   |
| S-C(2)     | 1.782(3)   |
| O(1)-C(1)  | 1.323(3)   |
| O(2)-C(13) | 1.329(3)   |
| O(3)-C(26) | 1.441(3)   |
| O(3)-C(23) | 1.448(3)   |
| O(4)-C(27) | 1.451(3)   |
| O(4)-C(30) | 1.452(3)   |
| C(1)-C(2)  | 1.419(3)   |
| C(1)-C(6)  | 1.421(4)   |
| C(2)-C(3)  | 1.393(3)   |
| C(3)-C(4)  | 1.388(4)   |
| C(3)-H(3)  | 0.9500     |
| C(4)-C(5)  | 1.391(4)   |
| C(4)-C(7)  | 1.514(4)   |
| C(5)-C(6)  | 1.395(3)   |
| C(5)-H(5)  | 0.9500     |
| C(6)-C(8)  | 1.541(4)   |

|              |          |
|--------------|----------|
| C(7)-H(7A)   | 0.9800   |
| C(7)-H(7B)   | 0.9800   |
| C(7)-H(7C)   | 0.9800   |
| C(8)-C(10)   | 1.536(4) |
| C(8)-C(11)   | 1.537(4) |
| C(8)-C(9)    | 1.543(4) |
| C(9)-H(9A)   | 0.9800   |
| C(9)-H(9B)   | 0.9800   |
| C(9)-H(9C)   | 0.9800   |
| C(10)-H(10A) | 0.9800   |
| C(10)-H(10B) | 0.9800   |
| C(10)-H(10C) | 0.9800   |
| C(11)-H(11A) | 0.9800   |
| C(11)-H(11B) | 0.9800   |
| C(11)-H(11C) | 0.9800   |
| C(12)-C(17)  | 1.400(3) |
| C(12)-C(13)  | 1.418(4) |
| C(13)-C(14)  | 1.423(4) |
| C(14)-C(15)  | 1.393(4) |
| C(14)-C(19)  | 1.533(4) |
| C(15)-C(16)  | 1.399(4) |
| C(15)-H(15)  | 0.9500   |
| C(16)-C(17)  | 1.381(4) |
| C(16)-C(18)  | 1.516(4) |
| C(17)-H(17)  | 0.9500   |
| C(18)-H(18A) | 0.9800   |
| C(18)-H(18B) | 0.9800   |
| C(18)-H(18C) | 0.9800   |
| C(19)-C(22)  | 1.531(4) |
| C(19)-C(20)  | 1.535(4) |
| C(19)-C(21)  | 1.543(4) |
| C(20)-H(20A) | 0.9800   |
| C(20)-H(20B) | 0.9800   |
| C(20)-H(20C) | 0.9800   |

|              |          |
|--------------|----------|
| C(21)-H(21A) | 0.9800   |
| C(21)-H(21B) | 0.9800   |
| C(21)-H(21C) | 0.9800   |
| C(22)-H(22A) | 0.9800   |
| C(22)-H(22B) | 0.9800   |
| C(22)-H(22C) | 0.9800   |
| C(23)-C(24)  | 1.524(5) |
| C(23)-H(23A) | 0.9900   |
| C(23)-H(23B) | 0.9900   |
| C(24)-C(25)  | 1.530(6) |
| C(24)-H(24A) | 0.9900   |
| C(24)-H(24B) | 0.9900   |
| C(25)-C(26)  | 1.514(5) |
| C(25)-H(25A) | 0.9900   |
| C(25)-H(25B) | 0.9900   |
| C(26)-H(26A) | 0.9900   |
| C(26)-H(26B) | 0.9900   |
| C(27)-C(28)  | 1.461(5) |
| C(27)-H(27A) | 0.9900   |
| C(27)-H(27B) | 0.9900   |
| C(28)-C(29)  | 1.427(5) |
| C(28)-H(28A) | 0.9900   |
| C(28)-H(28B) | 0.9900   |
| C(29)-C(30)  | 1.463(5) |
| C(29)-H(29A) | 0.9900   |
| C(29)-H(29B) | 0.9900   |
| C(30)-H(30A) | 0.9900   |
| C(30)-H(30B) | 0.9900   |
| O(5)-C(34)   | 1.422(5) |
| O(5)-C(31)   | 1.423(5) |
| C(31)-C(32)  | 1.482(6) |
| C(31)-H(31A) | 0.9900   |
| C(31)-H(31B) | 0.9900   |
| C(32)-C(33)  | 1.487(6) |

|              |           |
|--------------|-----------|
| C(32)-H(32A) | 0.9900    |
| C(32)-H(32B) | 0.9900    |
| C(33)-C(34)  | 1.506(6)  |
| C(33)-H(33A) | 0.9900    |
| C(33)-H(33B) | 0.9900    |
| C(34)-H(34A) | 0.9900    |
| C(34)-H(34B) | 0.9900    |
| C(35)-C(36)  | 1.461(15) |
| C(35)-H(35A) | 0.9800    |
| C(35)-H(35B) | 0.9800    |
| C(35)-H(35C) | 0.9800    |
| C(36)-C(37)  | 1.558(15) |
| C(36)-H(36A) | 0.9900    |
| C(36)-H(36B) | 0.9900    |
| C(37)-C(38)  | 1.500(13) |
| C(37)-H(37A) | 0.9900    |
| C(37)-H(37B) | 0.9900    |
| C(38)-C(39)  | 1.515(14) |
| C(38)-H(38A) | 0.9900    |
| C(38)-H(38B) | 0.9900    |
| C(39)-H(39A) | 0.9800    |
| C(39)-H(39B) | 0.9800    |
| C(39)-H(39C) | 0.9800    |
| C(40)-C(41)  | 1.301(15) |
| C(40)-H(40A) | 0.9800    |
| C(40)-H(40B) | 0.9800    |
| C(40)-H(40C) | 0.9800    |
| C(41)-C(42)  | 1.318(14) |
| C(41)-H(41A) | 0.9900    |
| C(41)-H(41B) | 0.9900    |
| C(42)-C(43)  | 1.487(16) |
| C(42)-H(42A) | 0.9900    |
| C(42)-H(42B) | 0.9900    |
| C(43)-C(44)  | 1.506(16) |



|                  |             |
|------------------|-------------|
| C(43)-H(43A)     | 0.9900      |
| C(43)-H(43B)     | 0.9900      |
| C(44)-H(44A)     | 0.9800      |
| C(44)-H(44B)     | 0.9800      |
| C(44)-H(44C)     | 0.9800      |
| O(1)-Lu-O(2)     | 99.00(8)    |
| O(1)-Lu-O(4)     | 147.77(7)   |
| O(2)-Lu-O(4)     | 83.02(7)    |
| O(1)-Lu-O(3)     | 82.96(7)    |
| O(2)-Lu-O(3)     | 144.13(7)   |
| O(4)-Lu-O(3)     | 77.45(8)    |
| O(1)-Lu-S        | 70.43(5)    |
| O(2)-Lu-S        | 69.95(5)    |
| O(4)-Lu-S        | 80.38(5)    |
| O(3)-Lu-S        | 77.26(5)    |
| O(1)-Lu-Lu#1     | 107.31(5)   |
| O(2)-Lu-Lu#1     | 110.03(5)   |
| O(4)-Lu-Lu#1     | 101.99(5)   |
| O(3)-Lu-Lu#1     | 103.32(5)   |
| S-Lu-Lu#1        | 177.633(13) |
| O(1)-Lu-H(1)     | 86.4(9)     |
| O(2)-Lu-H(1)     | 87.4(9)     |
| O(4)-Lu-H(1)     | 125.8(9)    |
| O(3)-Lu-H(1)     | 128.3(9)    |
| S-Lu-H(1)        | 143.8(9)    |
| Lu#1-Lu-H(1)     | 34.3(9)     |
| C(12)-S-C(2)     | 103.36(12)  |
| C(12)-S-Lu       | 95.56(8)    |
| C(2)-S-Lu        | 95.17(8)    |
| C(1)-O(1)-Lu     | 135.07(16)  |
| C(13)-O(2)-Lu    | 135.32(17)  |
| C(26)-O(3)-C(23) | 104.6(2)    |
| C(26)-O(3)-Lu    | 116.82(17)  |

|                  |            |
|------------------|------------|
| C(23)-O(3)-Lu    | 133.70(17) |
| C(27)-O(4)-C(30) | 108.7(2)   |
| C(27)-O(4)-Lu    | 124.62(17) |
| C(30)-O(4)-Lu    | 126.59(16) |
| O(1)-C(1)-C(2)   | 120.4(2)   |
| O(1)-C(1)-C(6)   | 122.0(2)   |
| C(2)-C(1)-C(6)   | 117.6(2)   |
| C(3)-C(2)-C(1)   | 122.2(2)   |
| C(3)-C(2)-S      | 118.9(2)   |
| C(1)-C(2)-S      | 118.91(18) |
| C(4)-C(3)-C(2)   | 120.0(2)   |
| C(4)-C(3)-H(3)   | 120.0      |
| C(2)-C(3)-H(3)   | 120.0      |
| C(3)-C(4)-C(5)   | 118.1(2)   |
| C(3)-C(4)-C(7)   | 120.9(3)   |
| C(5)-C(4)-C(7)   | 121.0(3)   |
| C(4)-C(5)-C(6)   | 123.8(3)   |
| C(4)-C(5)-H(5)   | 118.1      |
| C(6)-C(5)-H(5)   | 118.1      |
| C(5)-C(6)-C(1)   | 118.2(2)   |
| C(5)-C(6)-C(8)   | 121.3(2)   |
| C(1)-C(6)-C(8)   | 120.4(2)   |
| C(4)-C(7)-H(7A)  | 109.5      |
| C(4)-C(7)-H(7B)  | 109.5      |
| H(7A)-C(7)-H(7B) | 109.5      |
| C(4)-C(7)-H(7C)  | 109.5      |
| H(7A)-C(7)-H(7C) | 109.5      |
| H(7B)-C(7)-H(7C) | 109.5      |
| C(10)-C(8)-C(11) | 107.9(2)   |
| C(10)-C(8)-C(6)  | 110.8(2)   |
| C(11)-C(8)-C(6)  | 112.1(2)   |
| C(10)-C(8)-C(9)  | 110.3(2)   |
| C(11)-C(8)-C(9)  | 107.4(2)   |
| C(6)-C(8)-C(9)   | 108.3(2)   |

|                     |            |
|---------------------|------------|
| C(8)-C(9)-H(9A)     | 109.5      |
| C(8)-C(9)-H(9B)     | 109.5      |
| H(9A)-C(9)-H(9B)    | 109.5      |
| C(8)-C(9)-H(9C)     | 109.5      |
| H(9A)-C(9)-H(9C)    | 109.5      |
| H(9B)-C(9)-H(9C)    | 109.5      |
| C(8)-C(10)-H(10A)   | 109.5      |
| C(8)-C(10)-H(10B)   | 109.5      |
| H(10A)-C(10)-H(10B) | 109.5      |
| C(8)-C(10)-H(10C)   | 109.5      |
| H(10A)-C(10)-H(10C) | 109.5      |
| H(10B)-C(10)-H(10C) | 109.5      |
| C(8)-C(11)-H(11A)   | 109.5      |
| C(8)-C(11)-H(11B)   | 109.5      |
| H(11A)-C(11)-H(11B) | 109.5      |
| C(8)-C(11)-H(11C)   | 109.5      |
| H(11A)-C(11)-H(11C) | 109.5      |
| H(11B)-C(11)-H(11C) | 109.5      |
| C(17)-C(12)-C(13)   | 122.0(2)   |
| C(17)-C(12)-S       | 119.3(2)   |
| C(13)-C(12)-S       | 118.66(18) |
| O(2)-C(13)-C(12)    | 120.0(2)   |
| O(2)-C(13)-C(14)    | 122.3(2)   |
| C(12)-C(13)-C(14)   | 117.7(2)   |
| C(15)-C(14)-C(13)   | 118.2(2)   |
| C(15)-C(14)-C(19)   | 121.2(2)   |
| C(13)-C(14)-C(19)   | 120.6(2)   |
| C(14)-C(15)-C(16)   | 124.0(3)   |
| C(14)-C(15)-H(15)   | 118.0      |
| C(16)-C(15)-H(15)   | 118.0      |
| C(17)-C(16)-C(15)   | 117.8(2)   |
| C(17)-C(16)-C(18)   | 121.4(3)   |
| C(15)-C(16)-C(18)   | 120.8(3)   |
| C(16)-C(17)-C(12)   | 120.3(3)   |

|                     |          |
|---------------------|----------|
| C(16)-C(17)-H(17)   | 119.8    |
| C(12)-C(17)-H(17)   | 119.8    |
| C(16)-C(18)-H(18A)  | 109.5    |
| C(16)-C(18)-H(18B)  | 109.5    |
| H(18A)-C(18)-H(18B) | 109.5    |
| C(16)-C(18)-H(18C)  | 109.5    |
| H(18A)-C(18)-H(18C) | 109.5    |
| H(18B)-C(18)-H(18C) | 109.5    |
| C(22)-C(19)-C(14)   | 108.5(2) |
| C(22)-C(19)-C(20)   | 107.7(3) |
| C(14)-C(19)-C(20)   | 112.3(2) |
| C(22)-C(19)-C(21)   | 110.1(2) |
| C(14)-C(19)-C(21)   | 110.8(2) |
| C(20)-C(19)-C(21)   | 107.3(3) |
| C(19)-C(20)-H(20A)  | 109.5    |
| C(19)-C(20)-H(20B)  | 109.5    |
| H(20A)-C(20)-H(20B) | 109.5    |
| C(19)-C(20)-H(20C)  | 109.5    |
| H(20A)-C(20)-H(20C) | 109.5    |
| H(20B)-C(20)-H(20C) | 109.5    |
| C(19)-C(21)-H(21A)  | 109.5    |
| C(19)-C(21)-H(21B)  | 109.5    |
| H(21A)-C(21)-H(21B) | 109.5    |
| C(19)-C(21)-H(21C)  | 109.5    |
| H(21A)-C(21)-H(21C) | 109.5    |
| H(21B)-C(21)-H(21C) | 109.5    |
| C(19)-C(22)-H(22A)  | 109.5    |
| C(19)-C(22)-H(22B)  | 109.5    |
| H(22A)-C(22)-H(22B) | 109.5    |
| C(19)-C(22)-H(22C)  | 109.5    |
| H(22A)-C(22)-H(22C) | 109.5    |
| H(22B)-C(22)-H(22C) | 109.5    |
| O(3)-C(23)-C(24)    | 104.7(3) |
| O(3)-C(23)-H(23A)   | 110.8    |

|                     |          |
|---------------------|----------|
| C(24)-C(23)-H(23A)  | 110.8    |
| O(3)-C(23)-H(23B)   | 110.8    |
| C(24)-C(23)-H(23B)  | 110.8    |
| H(23A)-C(23)-H(23B) | 108.9    |
| C(23)-C(24)-C(25)   | 104.7(3) |
| C(23)-C(24)-H(24A)  | 110.8    |
| C(25)-C(24)-H(24A)  | 110.8    |
| C(23)-C(24)-H(24B)  | 110.8    |
| C(25)-C(24)-H(24B)  | 110.8    |
| H(24A)-C(24)-H(24B) | 108.9    |
| C(26)-C(25)-C(24)   | 104.1(3) |
| C(26)-C(25)-H(25A)  | 110.9    |
| C(24)-C(25)-H(25A)  | 110.9    |
| C(26)-C(25)-H(25B)  | 110.9    |
| C(24)-C(25)-H(25B)  | 110.9    |
| H(25A)-C(25)-H(25B) | 109.0    |
| O(3)-C(26)-C(25)    | 104.8(3) |
| O(3)-C(26)-H(26A)   | 110.8    |
| C(25)-C(26)-H(26A)  | 110.8    |
| O(3)-C(26)-H(26B)   | 110.8    |
| C(25)-C(26)-H(26B)  | 110.8    |
| H(26A)-C(26)-H(26B) | 108.9    |
| O(4)-C(27)-C(28)    | 106.6(3) |
| O(4)-C(27)-H(27A)   | 110.4    |
| C(28)-C(27)-H(27A)  | 110.4    |
| O(4)-C(27)-H(27B)   | 110.4    |
| C(28)-C(27)-H(27B)  | 110.4    |
| H(27A)-C(27)-H(27B) | 108.6    |
| C(29)-C(28)-C(27)   | 108.1(3) |
| C(29)-C(28)-H(28A)  | 110.1    |
| C(27)-C(28)-H(28A)  | 110.1    |
| C(29)-C(28)-H(28B)  | 110.1    |
| C(27)-C(28)-H(28B)  | 110.1    |
| H(28A)-C(28)-H(28B) | 108.4    |

|                     |          |
|---------------------|----------|
| C(28)-C(29)-C(30)   | 108.1(3) |
| C(28)-C(29)-H(29A)  | 110.1    |
| C(30)-C(29)-H(29A)  | 110.1    |
| C(28)-C(29)-H(29B)  | 110.1    |
| C(30)-C(29)-H(29B)  | 110.1    |
| H(29A)-C(29)-H(29B) | 108.4    |
| O(4)-C(30)-C(29)    | 106.7(3) |
| O(4)-C(30)-H(30A)   | 110.4    |
| C(29)-C(30)-H(30A)  | 110.4    |
| O(4)-C(30)-H(30B)   | 110.4    |
| C(29)-C(30)-H(30B)  | 110.4    |
| H(30A)-C(30)-H(30B) | 108.6    |
| C(34)-O(5)-C(31)    | 108.9(3) |
| O(5)-C(31)-C(32)    | 106.0(3) |
| O(5)-C(31)-H(31A)   | 110.5    |
| C(32)-C(31)-H(31A)  | 110.5    |
| O(5)-C(31)-H(31B)   | 110.5    |
| C(32)-C(31)-H(31B)  | 110.5    |
| H(31A)-C(31)-H(31B) | 108.7    |
| C(31)-C(32)-C(33)   | 102.7(3) |
| C(31)-C(32)-H(32A)  | 111.2    |
| C(33)-C(32)-H(32A)  | 111.2    |
| C(31)-C(32)-H(32B)  | 111.2    |
| C(33)-C(32)-H(32B)  | 111.2    |
| H(32A)-C(32)-H(32B) | 109.1    |
| C(32)-C(33)-C(34)   | 103.9(3) |
| C(32)-C(33)-H(33A)  | 111.0    |
| C(34)-C(33)-H(33A)  | 111.0    |
| C(32)-C(33)-H(33B)  | 111.0    |
| C(34)-C(33)-H(33B)  | 111.0    |
| H(33A)-C(33)-H(33B) | 109.0    |
| O(5)-C(34)-C(33)    | 106.8(3) |
| O(5)-C(34)-H(34A)   | 110.4    |
| C(33)-C(34)-H(34A)  | 110.4    |

|                     |           |
|---------------------|-----------|
| O(5)-C(34)-H(34B)   | 110.4     |
| C(33)-C(34)-H(34B)  | 110.4     |
| H(34A)-C(34)-H(34B) | 108.6     |
| C(36)-C(35)-H(35A)  | 109.5     |
| C(36)-C(35)-H(35B)  | 109.5     |
| H(35A)-C(35)-H(35B) | 109.5     |
| C(36)-C(35)-H(35C)  | 109.5     |
| H(35A)-C(35)-H(35C) | 109.5     |
| H(35B)-C(35)-H(35C) | 109.5     |
| C(35)-C(36)-C(37)   | 115.7(13) |
| C(35)-C(36)-H(36A)  | 108.4     |
| C(37)-C(36)-H(36A)  | 108.4     |
| C(35)-C(36)-H(36B)  | 108.4     |
| C(37)-C(36)-H(36B)  | 108.4     |
| H(36A)-C(36)-H(36B) | 107.4     |
| C(38)-C(37)-C(36)   | 107.3(12) |
| C(38)-C(37)-H(37A)  | 110.2     |
| C(36)-C(37)-H(37A)  | 110.2     |
| C(38)-C(37)-H(37B)  | 110.2     |
| C(36)-C(37)-H(37B)  | 110.2     |
| H(37A)-C(37)-H(37B) | 108.5     |
| C(37)-C(38)-C(39)   | 112.4(13) |
| C(37)-C(38)-H(38A)  | 109.1     |
| C(39)-C(38)-H(38A)  | 109.1     |
| C(37)-C(38)-H(38B)  | 109.1     |
| C(39)-C(38)-H(38B)  | 109.1     |
| H(38A)-C(38)-H(38B) | 107.9     |
| C(38)-C(39)-H(39A)  | 109.5     |
| C(38)-C(39)-H(39B)  | 109.5     |
| H(39A)-C(39)-H(39B) | 109.5     |
| C(38)-C(39)-H(39C)  | 109.5     |
| H(39A)-C(39)-H(39C) | 109.5     |
| H(39B)-C(39)-H(39C) | 109.5     |
| C(41)-C(40)-H(40A)  | 109.5     |

|                     |           |
|---------------------|-----------|
| C(41)-C(40)-H(40B)  | 109.5     |
| H(40A)-C(40)-H(40B) | 109.5     |
| C(41)-C(40)-H(40C)  | 109.5     |
| H(40A)-C(40)-H(40C) | 109.5     |
| H(40B)-C(40)-H(40C) | 109.5     |
| C(40)-C(41)-C(42)   | 155(3)    |
| C(40)-C(41)-H(41A)  | 97.6      |
| C(42)-C(41)-H(41A)  | 97.6      |
| C(40)-C(41)-H(41B)  | 97.6      |
| C(42)-C(41)-H(41B)  | 97.6      |
| H(41A)-C(41)-H(41B) | 103.6     |
| C(41)-C(42)-C(43)   | 124.3(16) |
| C(41)-C(42)-H(42A)  | 106.3     |
| C(43)-C(42)-H(42A)  | 106.3     |
| C(41)-C(42)-H(42B)  | 106.3     |
| C(43)-C(42)-H(42B)  | 106.3     |
| H(42A)-C(42)-H(42B) | 106.4     |
| C(42)-C(43)-C(44)   | 109.1(15) |
| C(42)-C(43)-H(43A)  | 109.9     |
| C(44)-C(43)-H(43A)  | 109.9     |
| C(42)-C(43)-H(43B)  | 109.9     |
| C(44)-C(43)-H(43B)  | 109.9     |
| H(43A)-C(43)-H(43B) | 108.3     |
| C(43)-C(44)-H(44A)  | 109.5     |
| C(43)-C(44)-H(44B)  | 109.5     |
| H(44A)-C(44)-H(44B) | 109.5     |
| C(43)-C(44)-H(44C)  | 109.5     |
| H(44A)-C(44)-H(44C) | 109.5     |
| H(44B)-C(44)-H(44C) | 109.5     |

Symmetry transformations used to generate equivalent atoms: #1  $-x+1, y, -z+1/2$
